# Supplementary material for: Traditional Chinese medicine for smoking cessation: An umbrella review of systematic reviews and meta-analysis of randomized controlled trials
Source: PubMed Central journal article supplement (PMC10647068; doi:10.18332/tid/174090), 2023-11-15
Supplement: TID-21-150-s1.pdf [file TID-21-150-s1.pdf]

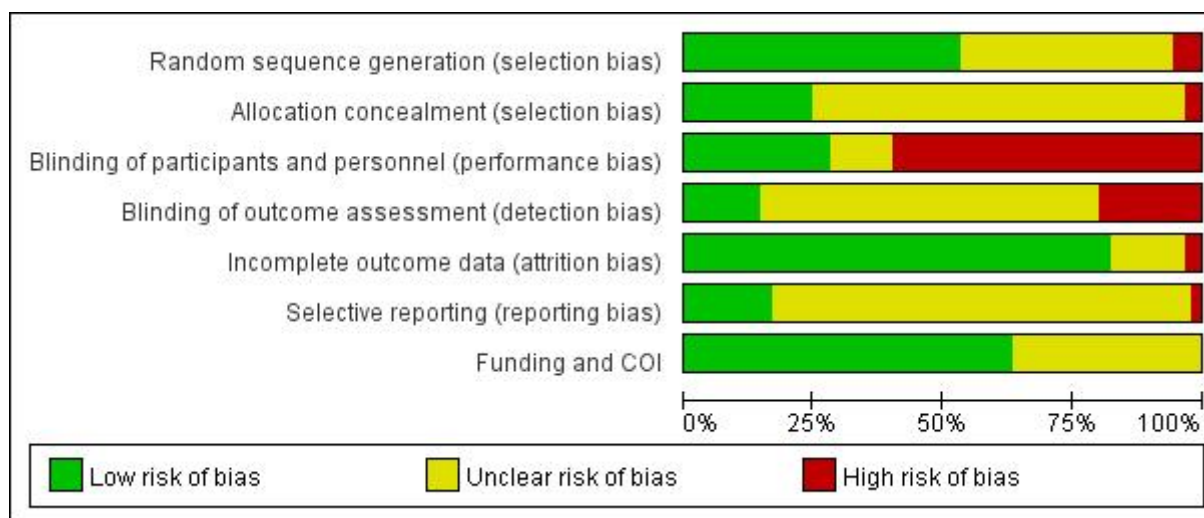

Supplementary Figure 1 Assessment of the risk of bias in RCTs of smoking cessation using TCM

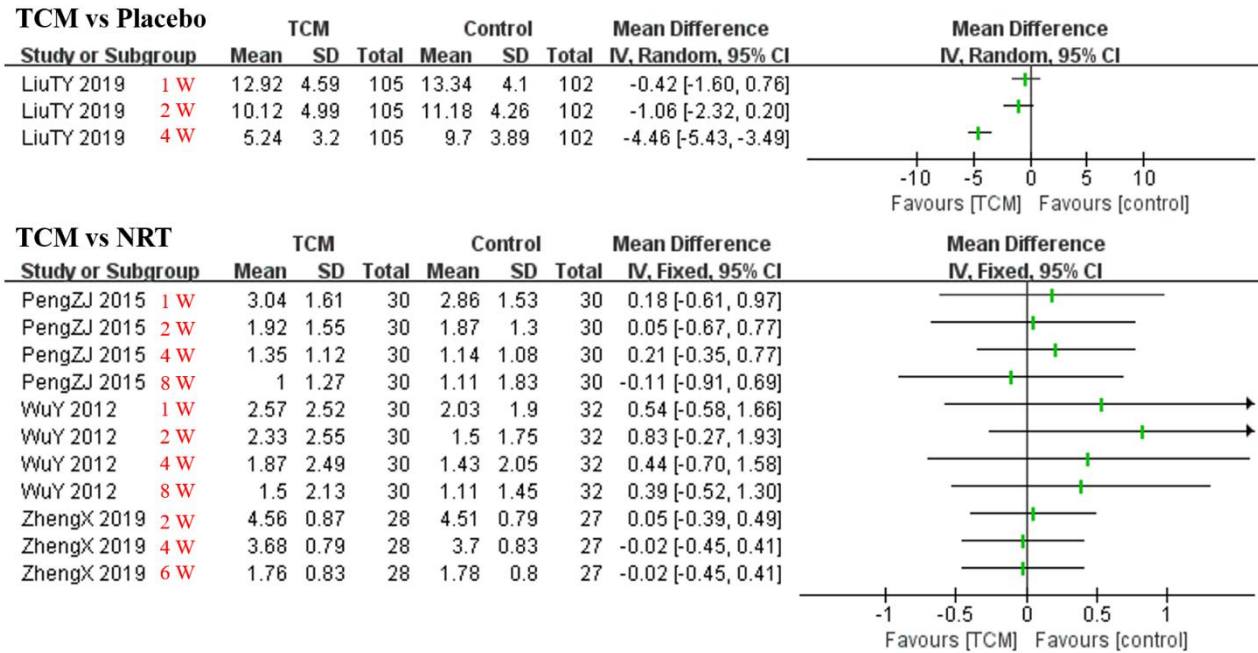

Supplementary Figure 2 Forest plot of RCTs on MNWS in TCM versus placebo and NRT

### TCM vs Placebo

| Study or Subgroup | TCM  |      |       | Control |      |       | Mean Difference      |
|-------------------|------|------|-------|---------|------|-------|----------------------|
|                   | Mean | SD   | Total | Mean    | SD   | Total | IV, Fixed, 95% CI    |
| LiuTY 2019 1 W    | 4.06 | 1.37 | 105   | 4.8     | 1.15 | 102   | -0.74 [-1.08, -0.40] |
| LiuTY 2019 2 W    | 2.75 | 1.81 | 105   | 4.4     | 1.69 | 102   | -1.65 [-2.13, -1.17] |
| LiuTY 2019 4 W    | 1.39 | 1.68 | 105   | 4.09    | 2.43 | 102   | -2.70 [-3.27, -2.13] |

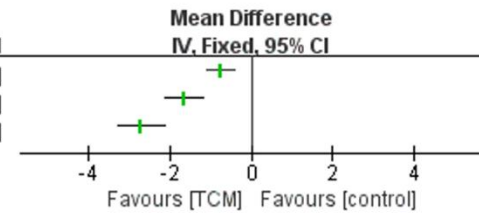

### TCM vs NRT

| Study or Subgroup | TCM  |      |       | Control |      |       | Mean Difference     |
|-------------------|------|------|-------|---------|------|-------|---------------------|
|                   | Mean | SD   | Total | Mean    | SD   | Total | IV, Fixed, 95% CI   |
| PengZJ 2015 1 W   | 3.04 | 1.61 | 30    | 2.86    | 1.53 | 30    | 0.18 [-0.61, 0.97]  |
| PengZJ 2015 2 W   | 1.92 | 1.55 | 30    | 1.87    | 1.3  | 30    | 0.05 [-0.67, 0.77]  |
| PengZJ 2015 4 W   | 1.35 | 1.12 | 30    | 1.14    | 1.08 | 30    | 0.21 [-0.35, 0.77]  |
| PengZJ 2015 8 W   | 1    | 1.27 | 30    | 1.11    | 1.83 | 30    | -0.11 [-0.91, 0.69] |
| WuY 2012 1 W      | 2.57 | 2.52 | 30    | 2.03    | 1.9  | 32    | 0.54 [-0.58, 1.66]  |
| WuY 2012 2 W      | 2.33 | 2.55 | 30    | 1.5     | 1.75 | 32    | 0.83 [-0.27, 1.93]  |
| WuY 2012 4 W      | 1.87 | 2.49 | 30    | 1.43    | 2.05 | 32    | 0.44 [-0.70, 1.58]  |
| WuY 2012 8 W      | 1.5  | 2.13 | 30    | 1.11    | 1.45 | 32    | 0.39 [-0.52, 1.30]  |
| ZhengX 2019 2 W   | 4.56 | 0.87 | 28    | 4.51    | 0.79 | 27    | 0.05 [-0.39, 0.49]  |
| ZhengX 2019 4 W   | 3.68 | 0.79 | 28    | 3.7     | 0.83 | 27    | -0.02 [-0.45, 0.41] |
| ZhengX 2019 6 W   | 1.76 | 0.83 | 28    | 1.78    | 0.8  | 27    | -0.02 [-0.45, 0.41] |

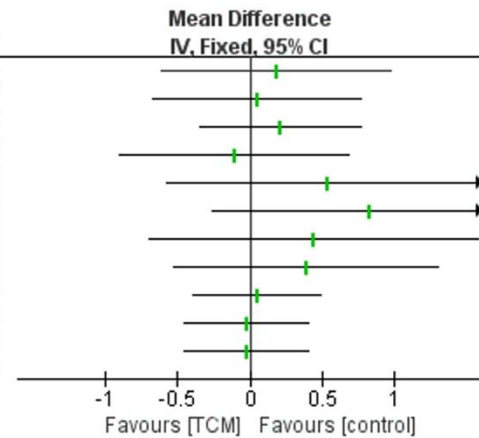

Supplementary Figure 3 Forest plot of RCTs on FTND in TCM versus placebo and NRT

Supplementary Table 1 Searching strategy

| <b>English search strategy</b> |                                                                         |
|--------------------------------|-------------------------------------------------------------------------|
| #1                             | smoking cessation                                                       |
| #2                             | cigarette smoking cessation                                             |
| #3                             | tobacco cessation                                                       |
| #4                             | tobacco smoking cessation                                               |
| #5                             | quit smoking                                                            |
| #6                             | stop smoking                                                            |
| #7                             | preventing smoking                                                      |
| #8                             | preventing tobacco                                                      |
| #9                             | preventing nicotine                                                     |
| #10                            | nicotine withdrawal                                                     |
| #11                            | nicotine dependence                                                     |
| #12                            | tobacco withdrawal syndrome                                             |
| #13                            | #1 OR #2 OR #3 OR #4 OR #5 OR #6 OR #7 OR #8 OR #9 OR #10 OR #11 OR #12 |
| #14                            | Chinese medicine                                                        |
| #15                            | integrated traditional Chinese and western medicine                     |
| #16                            | Chinese herbs                                                           |
| #17                            | herb                                                                    |
| #18                            | Chinese patent medicine                                                 |
| #19                            | decoction                                                               |
| #20                            | acupuncture                                                             |
| #21                            | electroacupuncture                                                      |
| #22                            | auricular acupuncture                                                   |
| #23                            | laser needle                                                            |
| #24                            | scalp acupuncture                                                       |
| #25                            | body acupuncture                                                        |
| #26                            | nose acupuncture                                                        |
| #27                            | needle-embedding therapy                                                |
| #28                            | Dai Zhen Gao                                                            |
| #29                            | auricular                                                               |
| #30                            | auricular point sticking                                                |
| #31                            | auricular-plaster                                                       |

|     |                                                                                                                                                                                                                |
|-----|----------------------------------------------------------------------------------------------------------------------------------------------------------------------------------------------------------------|
| #32 | acupressure                                                                                                                                                                                                    |
| #33 | plaster on acupuncture points                                                                                                                                                                                  |
| #34 | moxibustion                                                                                                                                                                                                    |
| #35 | tuina                                                                                                                                                                                                          |
| #36 | massage cupping                                                                                                                                                                                                |
| #37 | scraping                                                                                                                                                                                                       |
| #38 | compress                                                                                                                                                                                                       |
| #39 | hot compress                                                                                                                                                                                                   |
| #40 | smoking given up tea                                                                                                                                                                                           |
| #41 | qi gong                                                                                                                                                                                                        |
| #42 | Tai chi                                                                                                                                                                                                        |
| #43 | Diet therapy                                                                                                                                                                                                   |
| #44 | #14 OR #15 OR #16 OR #17 OR #18 OR #19 OR #20 OR #21 OR #22 OR #23 OR #24 OR #25 OR #26 OR #27 OR #28 OR #29 OR #30 OR #31 OR #32 OR #33 OR #34 OR #35 OR #36 OR #37 OR #38 OR #39 OR #40 OR #41 OR #42 OR #43 |
| #45 | randomized controlled trial                                                                                                                                                                                    |
| #46 | controlled clinical trial                                                                                                                                                                                      |
| #47 | randomized                                                                                                                                                                                                     |
| #48 | randomly                                                                                                                                                                                                       |
| #49 | randomization                                                                                                                                                                                                  |
| #50 | RCT                                                                                                                                                                                                            |
| #51 | trial                                                                                                                                                                                                          |
| #52 | groups                                                                                                                                                                                                         |
| #53 | allocat*                                                                                                                                                                                                       |
| #54 | blind procedure                                                                                                                                                                                                |
| #55 | crossover procedure                                                                                                                                                                                            |
| #56 | placebo                                                                                                                                                                                                        |
| #57 | single blind                                                                                                                                                                                                   |
| #58 | double blind                                                                                                                                                                                                   |
| #59 | blind                                                                                                                                                                                                          |
| #60 | systematic review                                                                                                                                                                                              |
| #61 | #45 OR #46 OR #47 OR #48 OR #49 OR #50 OR #51 OR #52 OR #53 OR #54 OR #55 OR #56 OR #57 OR #58 OR #59 OR #60                                                                                                   |
| #62 | #13 AND #44 AND #61                                                                                                                                                                                            |

### Chinese search strategy

|     |                                  |
|-----|----------------------------------|
| #1  | 戒烟                               |
| #2  | 烟草                               |
| #3  | 尼古丁                              |
| #4  | 尼古丁戒断                            |
| #5  | 尼古丁依赖                            |
| #6  | 戒烟综合征                            |
| #7  | #1 OR #2 OR #3 OR #4 OR #5 OR #6 |
| #8  | 中医                               |
| #9  | 中西医结合                            |
| #10 | 中药                               |
| #11 | 草药                               |
| #12 | 中成药                              |
| #13 | 汤药                               |
| #14 | 针灸                               |
| #15 | 针刺                               |
| #16 | 电针                               |
| #17 | 耳针                               |
| #18 | 激光针                              |
| #19 | 针刀                               |
| #20 | 滚针                               |
| #21 | 头针                               |
| #22 | 体针                               |
| #23 | 腹针                               |
| #24 | 鼻针                               |
| #25 | 腕踝针                              |
| #26 | 埋针                               |
| #27 | 埋线                               |
| #28 | 代针膏                              |
| #29 | 埋豆                               |
| #30 | 耳穴                               |
| #31 | 耳穴贴压                             |
| #32 | 耳压                               |
| #33 | 穴位按压                             |

|     |                                                                                                                                                                                                                                                                                                  |
|-----|--------------------------------------------------------------------------------------------------------------------------------------------------------------------------------------------------------------------------------------------------------------------------------------------------|
| #34 | 穴位注射                                                                                                                                                                                                                                                                                             |
| #35 | 穴位贴药                                                                                                                                                                                                                                                                                             |
| #36 | 针药结合                                                                                                                                                                                                                                                                                             |
| #37 | 体穴按摩                                                                                                                                                                                                                                                                                             |
| #38 | 艾灸                                                                                                                                                                                                                                                                                               |
| #39 | 推拿                                                                                                                                                                                                                                                                                               |
| #40 | 按摩                                                                                                                                                                                                                                                                                               |
| #41 | 拔罐                                                                                                                                                                                                                                                                                               |
| #42 | 刮痧                                                                                                                                                                                                                                                                                               |
| #43 | 贴敷                                                                                                                                                                                                                                                                                               |
| #44 | 热敷                                                                                                                                                                                                                                                                                               |
| #45 | 药物敷贴                                                                                                                                                                                                                                                                                             |
| #46 | 戒烟茶                                                                                                                                                                                                                                                                                              |
| #47 | 气功                                                                                                                                                                                                                                                                                               |
| #48 | 太极                                                                                                                                                                                                                                                                                               |
| #49 | 食疗                                                                                                                                                                                                                                                                                               |
| #50 | #8 OR #9 OR #10 OR #11 OR #12 OR #13 OR #14 OR #15 OR #16 OR #17 OR #18 OR #19 OR #20 OR #21 OR #22 OR #23 OR #24 OR #25 OR #26 OR #27 OR #28 OR #29 OR #30 OR #31 OR #32 OR #33 OR #34 OR #35 OR #36 OR #37 OR #38 OR #39 OR #40 OR #41 OR #42 OR #43 OR #44 OR #45 OR #46 OR #47 OR #48 OR #49 |
| #51 | 随机                                                                                                                                                                                                                                                                                               |
| #52 | 系统评价                                                                                                                                                                                                                                                                                             |
| #53 | 系统综述                                                                                                                                                                                                                                                                                             |
| #54 | #51 OR #52 OR #53                                                                                                                                                                                                                                                                                |
| #55 | #7 AND #50 AND #54                                                                                                                                                                                                                                                                               |

Supplementary Table 2 The list of included 88 randomized controlled trials

| Study ID      | Citation information                                                                                                                                                                                                                                                                                                         |
|---------------|------------------------------------------------------------------------------------------------------------------------------------------------------------------------------------------------------------------------------------------------------------------------------------------------------------------------------|
| Clavel F 1985 | [1] Clavel F, Benhamou S, Company-Huertas A, et al. Helping people to stop smoking: randomised comparison of groups being treated with acupuncture and nicotine gum with control group. <i>Br Med J (Clin Res Ed)</i> . 1985;291(6508):1538-1539. doi:10.1136/bmj.291.6508.1538                                              |
| Jiang B 2011  | [2] Jiang B, Zuo F, Wu L, et al. Effects of psychological intervention, auricular acupuncture and smoking cessation medication on cigarette smoking behavior in soldiers: a pilot randomized controlled trial. <i>Chinese Journal of Health Management</i> . 2011;5(6):353-356. doi:10.3760/cma.j.issn.1674-0815.2011.06.012 |
| Li BL 2016    | [3] Li BL. Clinical observation on the effectiveness of Shenmen, Pianli, and Danzhong acupuncture for smoking cessation. <i>China Academy of Chinese Medical Science</i> . 2016                                                                                                                                              |
| Li HY 2019    | [4] Li HY, He W. Comparative study of acupoint catgut embedding and bupropion hydrochloride sustained-release tablets for tobacco dependence. <i>Chinese Acupuncture &amp; Moxibustion</i> . 2019;39(04):384-388. doi:10.13703/j.0255-2930.2019.04.010.                                                                      |
| Li XP 2013    | [5] Li XP. Clinical abstinence analysis of 106 severe nicotine dependent smokers. <i>Journal of Guiyang College of Traditional Chinese Medicine</i> . 2013;35(03):95-96. doi:10.3969/j.issn.1002-1108.2013.03.0046                                                                                                           |
| Liang WL 2013 | [6] Liang WL. Clinical study of acupuncture for smoking withdraw syndrome. Guangzhou University of Chinese Medicine. 2013.                                                                                                                                                                                                   |
| Peng ZJ 2015  | [7] Peng ZJ. Clinical efficacy observation and cost-effectiveness ratio analysis of acupuncture and auricular acupoint pressing for abstinence from tobacco addiction. Beijing University of Chinese Medicine. 2015                                                                                                          |
| Wang YY 2017  | [8] Wang YY, Liu Z, Wu Y, et al. Efficacy of Acupuncture Is Noninferior to Nicotine Replacement Therapy for Tobacco Cessation: Results of a Prospective, Randomized, Active-Controlled Open-Label Trial. <i>Chest</i> . 2018;153(3):680-688. doi:10.1016/j.chest.2017.11.015                                                 |
| Wu Y 2012     | [9] Wu Y. Clinical effectiveness of acupuncture and moxibustion on smoking cessation. <i>China Academy of Chinese Medical Science</i> . 2012                                                                                                                                                                                 |
| Zeng XJ 2019  | [10] Zeng XJ, Chen ZQ, Wei YF, et al. Efficacy evaluation of acupoint catgut embedding in the treatment of tobacco dependence. <i>Shenzhen Journal of Integrated Traditional Chinese and Western Medicine</i> . 2019;29(23):57-59. doi:10.16458/j.cnki.1007-0893.2019.23.027.                                                |



|                 |                                                                                                                                                                                                                                                                                                                                             |
|-----------------|---------------------------------------------------------------------------------------------------------------------------------------------------------------------------------------------------------------------------------------------------------------------------------------------------------------------------------------------|
| Zheng X 2019    | [11] Zheng X, Qu NN, Ma LJ, et al. Clinical Study on the Intervention of TCM Quit Smoking Paste Combined with "5A" Program on Tobacco Dependent Population with Syndrome of Phlegm and Blood Stasis. <i>Journal of Liaoning University of Traditional Chinese Medicine</i> . 2019;21(3):113-116. doi: 10.13194/j.issn.1673-842x.2019.03.031 |
| Chen JH 2016    | [12] Chen JH, Wu ZH, Xu DB. Clinical effectiveness of Qingfei Huatan Liyan Decoction on "smoking lung" and traditional Chinese medicine on smoking cessation. <i>Nei Mongol Journal of Traditional Chinese Medicine</i> . 2016;35(13):56. doi:10.3969/j.issn.1006-0979.2016.13.058                                                          |
| Jang SB 2019    | [13] Jang S, Lee JA, Jang BH, et al. Clinical Effectiveness of Traditional and Complementary Medicine Interventions in Combination with Nicotine Replacement Therapy on Smoking Cessation: A Randomized Controlled Pilot Trial. <i>J Altern Complement Med</i> . 2019;25(5):526-534. doi:10.1089/acm.2019.0009                              |
| Li Z 2018       | [14] Li Z, Lu XQ, Lin XP. Effect of Combined Therapy of Traditional Chinese and Western Medicines on Moderate to Severe Nicotine Dependence. <i>Modern Hospital</i> . 2018;18(7):1046-1048,1051. doi:10.3969/j.issn.1671-332X.2018.07.036                                                                                                   |
| Sun WX 2016     | [15] Sun WX. Influence of traditional Chinese medicine quit smoking patch on relapse rate of "nicotine dependence". <i>Guangming Journal of Chinese Medicine</i> . 2016;31(3):456. doi:10.3969/j.issn.1003-8914.2016.03.078                                                                                                                 |
| White AR 2007   | [16] White AR, Moody RC, Campbell JL. Acupressure for smoking cessation--a pilot study. <i>BMC Complement Altern Med</i> . 2007;7:8. Published 2007 Mar 14. doi:10.1186/1472-6882-7-8                                                                                                                                                       |
| Baccetti S 2015 | [17] Baccetti S, Monechi M V, Da Frè M, et al. Smoking cessation with counselling and Traditional Chinese Medicine (TCM): a randomized controlled trial. <i>Acupuncture &amp; Related Therapies</i> . 2015, 3(4):48-54. doi:10.1016/j.arthe.2016.05.002                                                                                     |
| Bier ID 2002    | [18] Bier ID, Wilson J, Studt P, et al. Auricular acupuncture, education, and smoking cessation: a randomized, sham-controlled trial. <i>Am J Public Health</i> . 2002;92(10):1642-1647. doi:10.2105/ajph.92.10.1642                                                                                                                        |
| Bilici M 2016   | [19] Bilici M, Güven S, Köşker S, et al. Electroacupuncture Therapy in Nicotine Dependence: A Double Blind, Sham-Controlled Study. <i>Noro Psikiyatr Ars</i> . 2016;53(1):28-32. doi:10.5152/npa.2015.9887                                                                                                                                  |
| Cai YM 2000     | [20] Yiming C, Changxin Z, Ung WS, et al. Laser acupuncture for adolescent smokers--a randomized double-blind controlled trial. <i>Am J Chin Med</i> . 2000;28(3-4):443-449. doi:10.1142/S0192415X00000520                                                                                                                                  |
| Chae YB 2011    | [21] Chae Y, Park HJ, Kang OS, et al. Acupuncture attenuates autonomic responses to smoking-related visual cues. <i>Complement Ther Med</i> . 2011;19 Suppl 1:S1-S7. doi:10.1016/j.ctim.2010.09.003                                                                                                                                         |

|                  |                                                                                                                                                                                                                                                                            |
|------------------|----------------------------------------------------------------------------------------------------------------------------------------------------------------------------------------------------------------------------------------------------------------------------|
| Fritz DJ 2013    | [22] Fritz DJ, Carney RM, Steinmeyer B, et al. The efficacy of auriculotherapy for smoking cessation: a randomized, placebo-controlled trial. <i>J Am Board Fam Med.</i> 2013;26(1):61-70. doi:10.3122/jabfm.2013.01.120157                                                |
| Georgiou AJ 1998 | [23] Georgiou AJ, Spencer CP, Davies GK, et al. Electrical stimulation therapy in the treatment of cigarette smoking. <i>J Subst Abuse.</i> 1998;10(3):265-274. doi:10.1016/s0899-3289(99)00005-x                                                                          |
| Gillams J 1984   | [24] Gillams J, Lewith GT, Machin D. Acupuncture and group therapy in stopping smoking. <i>Practitioner.</i> 1984;228(1389):341-344.                                                                                                                                       |
| He D 1997        | [25] He D, Berg JE, Høstmark AT. Effects of acupuncture on smoking cessation or reduction for motivated smokers. <i>Prev Med.</i> 1997;26(2):208-214. doi:10.1006/pmed.1996.0125                                                                                           |
| He D 2001        | [26] He D, Medbø JI, Høstmark AT. Effect of acupuncture on smoking cessation or reduction: an 8-month and 5-year follow-up study. <i>Prev Med.</i> 2001;33(5):364-372. doi:10.1006/pmed.2001.0901                                                                          |
| Huang Y 2012     | [27] Huang Y. Clinical observation of treating nicotine dependence with three needles of smoke combined with auricular sticking. Guangzhou University of Chinese Medicine.2012.                                                                                            |
| Hyun MK 2010     | [28] Hyun MK, Lee MS, Kang K, et al. Body Acupuncture for Nicotine Withdrawal Symptoms: A Randomized Placebo-controlled Trial. <i>Evid Based Complement Alternat Med.</i> 2010;7(2):233-238. doi:10.1093/ecam/nem179                                                       |
| Kang HC 2005     | [29] Kang HC, Shin KK, Kim KK, et al. The effects of the acupuncture treatment for smoking cessation in high school student smokers. <i>Yonsei Med J.</i> 2005;46(2):206-212. doi:10.3349/ymj.2005.46.2.206                                                                |
| Kerr CM 2008     | [30] Kerr C M, Lowe P B, Spielholz N I. Low level laser for the stimulation of acupoints for smoking cessation: A double blind, placebo controlled randomised trial and semi structured interviews. <i>Journal of Chinese Medicine.</i> 2008(86):46-51.                    |
| Lambert C 2011   | [31] Lambert C, Berlin I, Lee TL, et al. A standardized transcutaneous electric acupoint stimulation for relieving tobacco urges in dependent smokers. <i>Evid Based Complement Alternat Med.</i> 2011;2011:195714. doi:10.1093/ecam/nen074                                |
| Lee SN 2016      | [32] Lee S, Park H. The Effects of Auricular Acupressure on Smoking Cessation for Male College Students. <i>West J Nurs Res.</i> 2017;39(3):374-387. doi:10.1177/0193945916660080                                                                                          |
| Liu TY 2019      | [33] Liu TY. Evaluation of clinical efficacy and safety of Chinese traditional medicine quit smoking babu plaster on tobacco dependence (phlegm and blood stasis syndrome). Liaoning University of Chinese Medicine. 2019.                                                 |
| Ma W 2014        | [34] Ma W, Xue JC. Effects of acupuncture and moxibustion on sialic acid and C-reactive protein in patients who quit smoking. <i>Moder n Journal of Integrated Traditional Chinese and Western Medicine.</i> 2014;(30):3337-3338.doi:10.3969/j.issn.1008-8849.2014.30.011. |

|                 |                                                                                                                                                                                                                                                         |
|-----------------|---------------------------------------------------------------------------------------------------------------------------------------------------------------------------------------------------------------------------------------------------------|
| Sood A 2010     | [35] Sood A, Ebbert JO, Prasad K, et al. A randomized clinical trial of St. <i>John's wort</i> for smoking cessation. <i>J Altern Complement Me d.</i> 2010;16(7):761-767. doi:10.1089/acm.2009.0445                                                    |
| Steiner RP 1982 | [36] Steiner RP, Hay DL, Davis AW. Acupuncture therapy for the treatment of tobacco smoking addiction. <i>Am J Chin Med.</i> 1982;10(1-4):107-121. doi:10.1142/S0192415X82000178                                                                        |
| Sun X 2009      | [37] Sun X. Clinical study on 24 cases of smoking dependence cured by Traditional Chinese medicine kangyangjian. 2009 National Symposium on Drug Abuse Prevention. 2009                                                                                 |
| Waite NR 1998   | [38] Waite NR, Clough JB. A single-blind, placebo-controlled trial of a simple acupuncture treatment in the cessation of smoking. <i>Br J Gen Pract.</i> 1998;48(433):1487-1490.                                                                        |
| White AR 1998   | [39] White AR, Resch KL, Ernst E. Randomized trial of acupuncture for nicotine withdrawal symptoms. <i>Arch Intern Med.</i> 1998;158(20):2251-2255. doi:10.1001/archinte.158.20.2251                                                                    |
| LI YK 2010      | [40] Wing Y K, Lee A, Wong E L Y, et al. Auricular Acupressure for Smoking Cessation: A Pilot Randomized Controlled Trial. <i>Medical Acupuncture.</i> 2010, 22(4):265-271. doi: 10.1089/acu.2010.0763                                                  |
| Wu TP 2007      | [41] Wu TP, Chen FP, Liu JY, Lin MH, Hwang SJ. A randomized controlled clinical trial of auricular acupuncture in smoking cessation. <i>J Chin Med Assoc.</i> 2007;70(8):331-338. doi:10.1016/S1726-4901(08)70014-5                                     |
| Yeh ML 2009     | [42] Yeh ML, Chang CY, Chu NF, Chen HH. A six-week acupoint stimulation intervention for quitting smoking. <i>Am J Chin Med.</i> 2009;37(5):829-836. doi:10.1142/S0192415X09007314                                                                      |
| Zhang AL 2013   | [43] Zhang AL, Di YM, Worsnop C, et al. Ear acupressure for smoking cessation: a randomised controlled trial. <i>Evid Based Complement Alternat Med.</i> 2013;2013:637073. doi:10.1155/2013/637073                                                      |
| Zhao HJ 2018    | [44] Zhao HJ, Ren XL, Chang XH, et al. Effect of self-made Chinese herb application by plastering on acupoint for smoking cessation. <i>Journal of Gansu University of Chinese Medicine.</i> 2018;35(1):77-80. doi: 10.16841/j.issn1003-8450.2018.01.21 |
| Bai L 2001      | [45] Bai L, Ren BQ. Effect of needling Ren's smoking cessation zone on cotinine content. <i>Modern Rehabilitation.</i> 2001;5(3):144. doi: 10.3321/j.issn:1673-8225.2001.03.120                                                                         |
| Chen H 2019     | [46] Chen H. The influence of smoking on lung function and the effect of qingfei tea on smoking cessation. Hebei North University. 2019.                                                                                                                |
| Gilbey V 1977   | [47] Gilbey V, Neumann B. Auricular acupuncture for smoking withdrawal. <i>American Journal of Acupuncture.</i> 1977, 5(3):239-247.                                                                                                                     |

|               |                                                                                                                                                                                                                                                                               |
|---------------|-------------------------------------------------------------------------------------------------------------------------------------------------------------------------------------------------------------------------------------------------------------------------------|
| Gong ZY 2008  | [48] Gong ZY, Tang SJ, Liu XL, et al. The influence of smoking on lung function and the effect of qingfei tea on smoking cessation. Hebei North University. 2019.                                                                                                             |
| Li Y 2009     | [49] Li Y, Shen TL, Cao LY, et al. Experimental Research of Radom, Comparison and Single Blind on Quitting Smoking by Auricular-plaster Therapy. <i>Jilin Journal of Traditional Chinese Medicine</i> . 2009;29(6):505-506. doi: 10.3969/j.issn.1003-5699.2009.06.027         |
| ReifMH 1999   | [50] Hernandez-Reif M, Field T, Hart S. Smoking cravings are reduced by self-massage. <i>Prev Med</i> . 1999;28(1):28-32. doi:10.1006/pmed.1998.0372                                                                                                                          |
| Silva RP 2014 | [51] Silva Rde P, Chaves Ede C, Pillon SC, et al. Contributions of auriculotherapy in smoking cessation: a pilot study. <i>Rev Esc Enferm USP</i> . 2014;48(5):883-890. doi:10.1590/s0080-6234201400005000015                                                                 |
| Wang YX 2006  | [52] Wang YX. Clinical study on continuous stimulation of auricular points to quit smoking. <i>China Journal of Traditional Chinese Medicine and Pharmacy</i> . 2006;004(5).                                                                                                  |
| Zhang Y 2017  | [53] Zhang Y. Clinical observation on 30 cases of smoking cessation syndrome treated by acupuncture (combined with snap acupuncture). <i>Heilongjiang Journal of Traditional Chinese Medicine</i> . 2017;46(2):60.                                                            |
| Chu C 2013    | [54] Chu C. Study on the application of acupoint reinforcing and reducing in the clinical treatment of smoking cessation. Nanjing University of Chinese Medicine. 2013.                                                                                                       |
| Guo B 2020    | [55] Guo B, Gong LL. Effect Analysis of Traditional Chinese Medicine Nursing of Auricular Acupoint Pressing Combined with "5A" Method on Smoking Cessation in Patients with Angina Pectoris. <i>Guide of China Medicine</i> . 2020;18(22):153-154.                            |
| He HJ 2019    | [56] He HJ. Clinical study on smoking cessation with fire needle. Guangzhou University of Chinese Medicine. 2019.                                                                                                                                                             |
| Lee EJ 2019   | [57] Lee EJ. Auricular Acupressure and Positive Group Psychotherapy With Motivational Interviewing for Smoking Cessation. <i>Holist Nurs Pract</i> . 2019;33(4):214-221. doi:10.1097/HNP.0000000000000333                                                                     |
| Lee EJ 2020   | [58] Lee EJ. The Effect of Auricular Acupressure and Positive Group Psychotherapy With Motivational Interviewing for Smoking Cessation in Korean Adults. <i>Holist Nurs Pract</i> . 2020;34(2):113-120. doi:10.1097/HNP.0000000000000348                                      |
| Leung JP 1991 | [59] Tobacyk, J, Miller, M. Comment on "Maslow's Study of Self-Actualization." <i>Journal of Humanistic Psychology</i> . 1991;31(4), 96-98. doi:10.1177/0022167891314007                                                                                                      |
| Li LB 2011    | [60] Li LB, Sun JW, Xu DL, et al. The Approach of Ear Acupuncture Combining to Psychological Intervention with the Health Belief Mode in Community Tobacco Control. <i>Zhejiang Journal of Preventive Medicine</i> . 2011;23(9):23-25. doi: 10.3969/j.issn.1007-0931.2011.09. |

|                  |                                                                                                                                                                                                                                                                                                                    |
|------------------|--------------------------------------------------------------------------------------------------------------------------------------------------------------------------------------------------------------------------------------------------------------------------------------------------------------------|
|                  | 007                                                                                                                                                                                                                                                                                                                |
| Sun CX 2000      | [61] Sun CX. Roles of Psychological Nursing Played in the Course of Auricle Point Applying to Help Individuals Giving up Smoking. <i>Shanxi Nursing Journal</i> . 2000;14(2):69-70. doi: 10.3969/j.issn.1009-6493.2000.02.016                                                                                      |
| Wan ZX 2021      | [62] Wan ZX, Yao YL, Chen JL, et al. Clinical effect of auricular point pressing seeds combined with cognitive behavioral therapy on reducing relapse rate of smoking cessation. <i>Clinical Research and Practice</i> . 2021;6(10):120-122. doi:10.19347/j.cnki.2096-1413.202110038                               |
| Yavagal PC 2021  | [63] Yavagal PC, L N. Efficacy of Laser Auricular Acupuncture for Smoking Cessation: A randomised controlled trial. <i>Sultan Qaboos U niv Med J</i> . 2021;21(2):e275-e281. doi:10.18295/squmj.2021.21.02.017                                                                                                     |
| Yeh ML2014       | [64] Yeh ML, Wang PL, Lin JG, Chung ML. The effects and measures of auricular acupressure and interactive multimedia for smoking cessation in college students. <i>Evid Based Complement Alternat Med</i> . 2014;2014:898431. doi:10.1155/2014/898431                                                              |
| Zhao L 2017      | [65] Zhao L. Clinical observation of auricular acupoint pressing combined with cognitive behavioral therapy (CBT) in the treatment of nicotine dependence. Shanxi University of Chinese Medicine. 2017                                                                                                             |
| Chai X 2019      | [66] Chai X, Yang JS, Liu Z, et al. Effect of the different smoking cessation regimens with acupuncture on smoking withdrawal and their influence factors: a multi-center randomized controlled trial. <i>Chinese Acupuncture &amp; Moxibustion</i> . 2019;39(12):1255-1261. doi: 10.13703/j.0255-2930.2019.12.001 |
| Chapelon FC 1997 | [67] Clavel-Chapelon F, Paoletti C, Benhamou S. Smoking cessation rates 4 years after treatment by nicotine gum and acupuncture. <i>Prev Med</i> . 1997;26(1):25-28. doi:10.1006/pmed.1996.9997                                                                                                                    |
| Cottraux JA 1983 | [68] Cottraux JA, Harf R, Boissel JP, et al. Smoking cessation with behaviour therapy of acupuncture--a controlled study. <i>Behav Res Ther</i> . 1983;21(4):417-424. doi:10.1016/0005-7967(83)90011-6                                                                                                             |
| Gu ZR 2007       | [69] Gu ZR. Clinical summary and discussion of 400 cases of quitting smoking with acupoint therapy. The 13th National Symposium on Smoking and Health and the third FCTC Forum. 2007                                                                                                                               |
| Parker LN 1977   | [70] Gilbey V, Neumann B. Auricular acupuncture for smoking withdrawal. <i>American Journal of Acupuncture</i> . 1977;5(3):239-247.                                                                                                                                                                                |
| Qin YB 2020      | [71] Qin YB, Qu NN, Zheng X, et al. Clinical observation of Chinese herbal quit smoking Babu Patch combining acupuncture treating tobacco dependence with phlegm and blood stasis syndrome. <i>China Journal of Traditional Chinese Medicine and Pharmacy</i> . 2020;35(11): 5868-5872.                            |

|               |                                                                                                                                                                                                                                                                                                         |
|---------------|---------------------------------------------------------------------------------------------------------------------------------------------------------------------------------------------------------------------------------------------------------------------------------------------------------|
| Han Y 2006    | [72] Han Y. Treatment of 42 cases of smoking cessation syndrome by acupuncture combined with auricular acupoint pressing. <i>Journal of Clinical acupuncture and moxibustion</i> . 2006; 22(11):16-16. doi: 10.3969/j.issn.1005-0779.2006.11.011                                                        |
| Liu D 2015    | [73] Liu D, Shao YR, Liu F. Clinical Study on Acupuncture plus Auricular Point Sticking in Improving Tobacco Withdrawal Symptoms After Smoke Cessation. <i>Shanghai Journal of Acupuncture and Moxibustion</i> . 2015;(7):629-631. doi: 10.13460/j.issn.1005-0957.2015.07.0629                          |
| Wang DF 2021  | [74] Wang DF, Wang LM, Yu J, et al. Research on the Clinical Effect of Auricular Point Sticking on 160 Cases of Smoking Cessation Based on the Method of Auricular Point Sticking with Cow Herb Seed. <i>Chinese Primary Health Care</i> . 2021;35(6):76-78. doi: 10.3969/j.issn.1001-568X.2021.06.0023 |
| Wang WH 2013  | [75] Wang WH, Song YX. Clinical Trial of Acupuncture plus Moxibustion for Smoke Cessation. <i>Shanghai Journal of Acupuncture and Moxibustion</i> . 2013;32(4):287-288. doi: 10.3969/j.issn.1005-0957.2013.04.287                                                                                       |
| Wang XJ 2013  | [76] Wang XJ, Xu B, Li JW, et al. Observation on the effectiveness of sticking tea on smoking cessation. <i>Shanxi Journal of Traditional Chinese Medicine</i> . 2013;34(4):430-433. doi: 10.3969/j.issn.1000-7369.2013.04.027                                                                          |
| Zhou JH 2010  | [77] Zhou JH, Wang RF. Observation on Effect of Electrical Acupuncture and Ear Pressure with Magnetic Bead on Smoking Abstinence. <i>Journal of Nanjing University of Traditional Chinese Medicine</i> . 2010;26(1):79-80. doi: 10.3969/j.issn.1000-5005.2010.01.027                                    |
| Zhang JM 1989 | [78] Zhang JM, Tan SG, Yu JB. 120 cases of smoking cessation with auricular acupoint and body acupoint pressure. <i>Modern Traditional Chinese Medicine</i> . 1989;(4):28-29.                                                                                                                           |
| Zhang QG 2004 | [79] Zhang QG, Gu KB, Wang D, et al. Treatment of tobacco dependence with wrist-ankle acupuncture:A report of 30 cases. <i>Journal of Integrative Medicine</i> . 2004;2(6):444-444,480.                                                                                                                 |
| Zhang X 2016  | [80] Zhang X. Clinical observation on the treatment of Tobacco dependence with Liver Stagnation and Qi Stagnation by acupoint acupuncture of Liver Meridian and mother. Heilongjiang University of Chinese Medicine. 2016                                                                               |
| Cai ZB 2022   | [81] Cai ZB, Zeng JC, Luo ZK, et al. Clinical randomized controlled trial of acupuncture combined with auricular acupoint compression in the treatment of tobacco dependence. <i>Chinese Journal of Traditional Chinese Medicine</i> . 2022;37(11):6864-6867.                                           |
| Chen SM 2022  | [82] Chen SM, Liu ZY, Ji J, et al. Auricular acupoint pressure combined with percutaneous acupoint electrical stimulation for smoking cessation: a randomized controlled trial. <i>Chinese Journal of Acupuncture</i> . 2022;42(11):1235-1239. doi:10.13703/J.0255-2930.20220104-k0001.                 |

|                      |                                                                                                                                                                                                                                                                         |
|----------------------|-------------------------------------------------------------------------------------------------------------------------------------------------------------------------------------------------------------------------------------------------------------------------|
| Chandrabhaga SV 2021 | [83] Velangi CS, Yavagal PC, Nagesh L. Role of auricular laser acupuncture and psychological counseling in reducing nicotine dependence due to smoking: A randomized controlled trial. <i>Indian J Public Health</i> . 2021;65(3):243-249. doi:10.4103/ijph.IJPH_810_20 |
| Dai RJ 2022          | [84] Dai R J. A randomized controlled trial of acupuncture for smoking cessation based on Bayesian mesh meta-analysis. Gansu university of traditional Chinese medicine, 2022.                                                                                          |
| Ji J 2022            | [85] Ji J. Smoking cessation effect of acupuncture with different frequency based on nicotine metabolic rate. China Academy of Traditional Chinese Medical Sciences, 2022.                                                                                              |
| Kuang HJ 2021        | [86] Kuang HJ, Fu SS, Huang Q, et al. Effects of auricular point sticking combined with transcranial direct current stimulation on tobacco dependence. <i>Journal of Rehabilitation</i> . 2021;31(05):381-388.                                                          |
| Zhang N 2022         | [87] Zhang N, She YL, Lin GH. Columns of acupuncture through thorn li 5 applied to study the clinical effect of nicotine addiction patients. <i>Big doctor</i> . 2022;7(17):79-81.                                                                                      |
| Zeng XJ 2021         | [88] Zeng X J. Effects of acupoint catgut embedding combined with cognitive behavioral therapy on smoking cessation rate, lung function and quality of life in tobacco dependent patients. <i>The Chinese and foreign medical research</i> . 2021;(24):169-171.         |

Supplementary Table 3 Characteristics of the 2 protocols of TCM for smoking cessation

| Study ID    | Country / region | Settings                                                | Target sample size | Participants                                                                                                                                         | Age/year | Smoking year | Daily cigarette consumption                                          | Comparison (Duration of intervention)                                                                                                                | Outcomes                                                                                                                                                                                                                                                  | Follow-up | Predicted completion time | Published or not |
|-------------|------------------|---------------------------------------------------------|--------------------|------------------------------------------------------------------------------------------------------------------------------------------------------|----------|--------------|----------------------------------------------------------------------|------------------------------------------------------------------------------------------------------------------------------------------------------|-----------------------------------------------------------------------------------------------------------------------------------------------------------------------------------------------------------------------------------------------------------|-----------|---------------------------|------------------|
| NCT02298127 | Hong Kong, China | School of Nursing, The Hong Kong Polytechnic University | 90                 | Be able to communicate in Cantonese; Currently reside in Hong Kong and expect to continue to do so for the next 6 months; Have access to a telephone | ≥18      |              | Currently smoking at least one cigarette per day in the past 30 days | Auricular acupressure vs Sham auricular acupressure (4 w)                                                                                            | 7-day point prevalence by self-report; 7-day point prevalence by self-report, validated by biochemical measure; Withdrawal symptoms                                                                                                                       | NR        | June 2016                 | Not found        |
| NCT01389622 | Canada/Ontario   | Queen's Family Health Team                              | 60                 | Participants with confirmed habit of tobacco smoking                                                                                                 | 18-75    | ≥6 m         | NR                                                                   | National Acupuncture Detoxification Association (NADA) points + Random points + digital pressure with urgedigital pressure vs Advice + support (6 w) | Spot 7-day cessation rate; Cessation Rate (CAR); End-expiratory carbon monoxide levels (CO); Adverse effects; Stress level according to the Stress Check List (SCL); Nicotine withdrawal symptoms according to Minnesota Nicotine Withdrawal Scale (MNWS) | 13 w      | January 2016              | Not found        |

Noted: NR=Not reported; w=week(s); m=month(s)



Supplementary Table 4 Summary of characteristics of 13 included systematic reviews of TCM for smoking cessation

| Study ID                        | TCM group intervention                                                                                                                                                                                                                                                                                                                                                                                                                                                  | Control group intervention                                                                                                                                                                                                         | Primary outcomes                                       | Secondary outcomes | Conclusion          |
|---------------------------------|-------------------------------------------------------------------------------------------------------------------------------------------------------------------------------------------------------------------------------------------------------------------------------------------------------------------------------------------------------------------------------------------------------------------------------------------------------------------------|------------------------------------------------------------------------------------------------------------------------------------------------------------------------------------------------------------------------------------|--------------------------------------------------------|--------------------|---------------------|
| Ashenden R 1997 <sup>[22]</sup> | Acupuncture, acupuncture + electro acupuncture, individual hypnosis, group hypnosis, self-monitoring, group behavior therapy, ankle acupuncture, acupuncture + nicotine gum                                                                                                                                                                                                                                                                                             | Sham acupuncture + electro acupuncture, nicotine gum, locked cigarette case, individual hypnosis, group hypnosis, sham acupuncture, self-monitoring, group behavior therapy, sham acupuncture + placebo gum                        | Smoking cessation rates                                | NR                 | Potential effective |
| Cheng HM 2012 <sup>[23]</sup>   | Acupuncture, auricular acupuncture, auricular acupressure, electroacupuncture, electrode placement, placebo acupuncture, placebo auricular acupuncture, placebo electroacupuncture, placebo medicine, waiting list, behavior therapy, group therapy, education, nicotine gum<br>Acupoints: Shenmen, sympathetic, lung, kidney, liver, hegu, shuaigu, qiuhou, bitong, shuaigou, gall bladder, lung, shuaigu, tongziliao, timme, mouth, lung, subcortex, endocrine, heart | Placebo acupuncture, placebo auricular acupuncture, placebo electroacupuncture, placebo medicine, waiting list, behavior therapy, group therapy, nicotine gum, placebo nicotine gum, lactose capsules, relaxation, self-monitoring | Smoking cessation rate and daily cigarette consumption | NR                 | Effective           |

| <b>Study ID</b>                 | <b>TCM group intervention</b>                                                                                                                                                                                                                                                          | <b>Control group intervention</b>                                                         | <b>Primary outcomes</b>                             | <b>Secondary outcomes</b>                                                                                                                                                                                                                                                                                                                                                                                                  | <b>Conclusion</b>   |
|---------------------------------|----------------------------------------------------------------------------------------------------------------------------------------------------------------------------------------------------------------------------------------------------------------------------------------|-------------------------------------------------------------------------------------------|-----------------------------------------------------|----------------------------------------------------------------------------------------------------------------------------------------------------------------------------------------------------------------------------------------------------------------------------------------------------------------------------------------------------------------------------------------------------------------------------|---------------------|
| Di YM<br>2014 <sup>[24]</sup>   | Combined ear and body points, methods of stimulation included needles, pressure, electricity, laser, and combinations of these                                                                                                                                                         | Sham acupuncture/acupressure, wait-list or no intervention, oral placebo, medical therapy | Cigarette smoking cessation                         | NR                                                                                                                                                                                                                                                                                                                                                                                                                         | Potential effective |
| Wang JH<br>2019 <sup>[25]</sup> | Transdermal acupuncture by needles with or without additional application of electrostimulation or laser therapy. The acupuncture points used could be on the body, ear, face or head, delivered as a monotherapy or in combination with other interventions (NRT, acupressure, etc.). | No intervention / waiting list, placebo,                                                  | Short-, mid-, and long-term abstinence from smoking | Nicotine withdrawal symptoms (NWS), the fagerstrom test for nicotine dependence (FTND), the beck depression inventory (BDI) and the beck anxiety inventory (bai), exhaled carbon monoxide (CO) level, cotinine content (in serum, urine or saliva), daily cigarette consumption, craving for cigarette, heaviness of smoking index (HSI), brief questionnaire of smoking urges (QSU-brief), and adverse events if reported | Potential effective |

| <b>Study ID</b>                  | <b>TCM group intervention</b>                                                                                                                                                 | <b>Control group intervention</b>                                                                                                                          | <b>Primary outcomes</b>                                                                                                                                                                                               | <b>Secondary outcomes</b>                                                                                                 | <b>Conclusion</b>   |
|----------------------------------|-------------------------------------------------------------------------------------------------------------------------------------------------------------------------------|------------------------------------------------------------------------------------------------------------------------------------------------------------|-----------------------------------------------------------------------------------------------------------------------------------------------------------------------------------------------------------------------|---------------------------------------------------------------------------------------------------------------------------|---------------------|
| Kim SS<br>2012 <sup>[26]</sup>   | Counseling, TCM (ear point seed pressure versus acupuncture), pharmacotherapy (nicotine sublingual tablet), a combination of pharmacotherapy and counseling, physician advice | Nicotine replacement therapy, placebo                                                                                                                      | Abstinence rate                                                                                                                                                                                                       | NR                                                                                                                        | Potential effective |
| Dai RJ<br>2021 <sup>[27]</sup>   | Auricular acupressure; acupuncture therapy; acupuncture combined with auricular acupressure                                                                                   | Sham acupuncture therapy; nicotine replacement therapy; sham auricular acupressure; auricular acupressure; acupuncture combined with auricular acupressure | Short-term and long-term abstinence rates.<br>breath carbon monoxide, urinary cotinine, or both.<br>The most rigorous criterion uses the most conservative outcome reported in any given randomized controlled trial. | The change of the scores of fagerstrom test for nicotine dependence (FTND) and daily smoking prior to and after treatment | Potential effective |
| Tahiri M<br>2012 <sup>[28]</sup> | Acupuncture                                                                                                                                                                   | NR                                                                                                                                                         |                                                                                                                                                                                                                       | NR                                                                                                                        | Potential effective |

| Study ID                     | TCM group intervention                                                                                                                                                                                                                                                                                                                                                                                                                                     | Control group intervention                                                                                                                                                                                                                                                                                                                                                                                                                                                                                             | Primary outcomes                                                                                                                                              | Secondary outcomes | Conclusion          |
|------------------------------|------------------------------------------------------------------------------------------------------------------------------------------------------------------------------------------------------------------------------------------------------------------------------------------------------------------------------------------------------------------------------------------------------------------------------------------------------------|------------------------------------------------------------------------------------------------------------------------------------------------------------------------------------------------------------------------------------------------------------------------------------------------------------------------------------------------------------------------------------------------------------------------------------------------------------------------------------------------------------------------|---------------------------------------------------------------------------------------------------------------------------------------------------------------|--------------------|---------------------|
| White AR 2014 <sup>[9]</sup> | Facial acupuncture; auricular acupuncture alone; continuous stimulation, either needle or pressure device; combined body and auricular acupuncture; continuous stimulation with either indwelling needles; facial, body, indwelling, and sham auricular acupuncture in different groups; acupressure alone; electrostimulation given over the mastoid bone; electrostimulation to the ear; continuous acupressure stimulation                              | Points for the control group (neurological approach); auricular point 'kidney'; vitamins and herbal medicine, extract of hawthorn; locked cigarette case controlled by a time-switch; placebo capsules; 'medical treatment' consisting of advice, a benzodiazepine drug, lobeline, and a 'detoxicant'; counselling; psychological approach; waiting list; placebo capsules; group therapy; no-treatment control arm; behavioral therapy                                                                                | Complete abstinence from smoking. The review has not been limited to studies where the outcome was confirmed biochemically.                                   | NR                 | Potential effective |
| White A 2006 <sup>[29]</sup> | 3 respiratory, aggression, sensory + psychotherapy; 2 bilateral lung; lung; 6 seeds, body electroacupuncture, ear acupuncture; 4 bilateral lung + shenmen; 1 suture + bead, earlobe; 2 sutures + beads, lung and shenmen; 2 lung, hunger, same with electroacupuncture one week later, cut-off stud; 2 lung, shenmen; 2 lung, stomach, body acupuncture; 4 seeds mouth, lung, subcortex, shenmen; zero, lung; 1 seed lung, counselling, electroacupuncture | Psychotherapy + illustrations; psychotherapy + medication; 2 studs, 'incorrect' point (kidney) bilateral; 1 stud, 'incorrect' pt; group therapy; 6 seeds in 'incorrect' points plus 6 sessions of ear acupuncture and body electroacupuncture, to 'incorrect' points; behavioral therapy; waiting list; suture 'incorrect' point; hypnosis, individual; hypnosis, group; no treatment; electroacupuncture; body acupuncture to 'incorrect' points (no press needles), and one session of ear acupuncture; advice; body | From the earliest time point available after treatment as this would be likely to show the greatest effect of treatment (and the least influence of relapse). | NR                 | Potential effective |

| Study ID                         | TCM group intervention                                                                                                                                                                                                                                                                            | Control group intervention                                                                                                                                                                                                                  | Primary outcomes                                   | Secondary outcomes | Conclusion          |
|----------------------------------|---------------------------------------------------------------------------------------------------------------------------------------------------------------------------------------------------------------------------------------------------------------------------------------------------|---------------------------------------------------------------------------------------------------------------------------------------------------------------------------------------------------------------------------------------------|----------------------------------------------------|--------------------|---------------------|
| Liu Z<br>2015 <sup>[30]</sup>    | Acupuncture, auricular acupressure + body acupuncture, auricular electrostimulation, auricular acupressure combined with psychological intervention, laser, waist and ankle acupuncture, auricular acupressure, electroacupuncture combined with auricular acupressure, acupuncture + moxibustion | acupuncture; nasal acupuncture; seeds to 'incorrect' points on knee (mean duration 7 days)<br><br>Placebo drug, NRT, sham acupuncture, psychological intervention, sham laser, body acupuncture, auricular acupressure, placebo acupuncture | NR                                                 | NR                 | Potential effective |
| White AR<br>1999 <sup>[31]</sup> | Facial; auricula; face; electroacupuncture; body                                                                                                                                                                                                                                                  | Sham; nicotine/placebo gum; behavioral; body, for relaxation; waiting list; nicotine gum; time cigarette case; placebo                                                                                                                      | complete cessation of smoking at three time points | NR                 | Potential effective |

| Study ID                         | TCM group intervention                                                                                                                                                         | Control group intervention                                                                                                                  | Primary outcomes                                                                                                                                                                                                | Secondary outcomes                                         | Conclusion          |
|----------------------------------|--------------------------------------------------------------------------------------------------------------------------------------------------------------------------------|---------------------------------------------------------------------------------------------------------------------------------------------|-----------------------------------------------------------------------------------------------------------------------------------------------------------------------------------------------------------------|------------------------------------------------------------|---------------------|
| Liu ZY<br>2023 <sup>[32]</sup>   | Body acupuncture, auricular acupressure, acupoint application, laser acupuncture                                                                                               | Nicotine patches, sham acupuncture, cognitive behavioral therapy                                                                            | MNWS, FTND, HIS, QSU, HAMD, withdrawal rate, effective rate                                                                                                                                                     | NR                                                         | Potential effective |
| Kuang HJ<br>2022 <sup>[33]</sup> | Acupuncture, acupuncture + auricular acupressure, auricular acupressure + counselling, fire needling, ear acupuncture, ear acupuncture + counselling, acupuncture + TCM patch, | Nicotine patch, sham acupuncture, education, sham ear acupuncture, sham ear acupuncture + education, sham auricular acupressure + education | Continuous abstinence rate, point abstinence rate (abstinence rate based on blood and urine cotinine concentration as evaluation criteria was preferred, followed by self-reported abstinence rate of quitters) | Effective rate, FTND score, MNWS score, safety evaluation. | Potential effective |

Noted: NR=Not reported; TCM=Traditional Chinese medicine; NRT=Nicotine replacement therapy; FTND=Fagerstrom Test of Nicotine Dependence; MNWS=Minnesota Nicotine Withdrawal Symptoms Scale; QSU-Brief= Brief Questionnaire of Smoking Urges; HAMD=Hamilton

Depression Scale; HIS=heaviness of smoking index

Supplementary Table 5 Characteristics of RCTs of traditional Chinese medicine smoking cessation

| Study ID                                                     | Sample size<br>(Total/in group:<br>p: M/F) | Participants  | TCM interventions                                                      | Comparison (Duration of intervention)                                                                                                                                  | Outcomes                                                                                                      | Follow-up |
|--------------------------------------------------------------|--------------------------------------------|---------------|------------------------------------------------------------------------|------------------------------------------------------------------------------------------------------------------------------------------------------------------------|---------------------------------------------------------------------------------------------------------------|-----------|
| <i>TCM vs. Bupropion, 1 trial</i>                            |                                            |               |                                                                        |                                                                                                                                                                        |                                                                                                               |           |
| Li HY 2019                                                   | 100<br>I:41/8<br>C:40/8                    | Adult smokers | Acupoint catgut embedding therapy                                      | Acupoint catgut embedding therapy vs. Bupropion hydrochloride sustained-release tablets (7 w)                                                                          | Abstinence rate, FTND, Medical CO detection; treatment compliance; adverse events and adverse event incidence | None      |
| <i>TCM vs. Nicotine replacement therapy (NRT), 12 trials</i> |                                            |               |                                                                        |                                                                                                                                                                        |                                                                                                               |           |
| Chen SM 2022                                                 | 200<br>I:99/1<br>C:98/2                    | Adult smokers | Transcutaneous electrical acupoint stimulation + Auricular acupressure | Transcutaneous electrical acupoint stimulation + Auricular acupressure vs Nicotine patch (8w)                                                                          | Abstinence rate, FTND, MNWS, adverse event, compliance                                                        | 16 w      |
| Clavel F 1985                                                | 651<br>I1:224<br>I2:205<br>C:222           | Adult smokers | Acupuncture                                                            | Acupuncture vs. Nicotine gum vs. Minimal intervention (consisting of a cigarette case with a lock controlled by a time switch, which they could regulate at will) (1m) | Abstinence rate                                                                                               | 13 m      |
| Li BL 2016                                                   | 50<br>I:25<br>C:25                         | Adult smokers | Acupuncture                                                            | Acupuncture vs. Nicotine patch (8 w)                                                                                                                                   | Abstinence rate, FTND, HSI, cobalt content, urinary cotinine content, adverse event                           | 6 m       |



|               |                                     |               |                                          |                                                                   |                                                                                                      |             |
|---------------|-------------------------------------|---------------|------------------------------------------|-------------------------------------------------------------------|------------------------------------------------------------------------------------------------------|-------------|
| Li XP 2013    | 106<br>I1:30/6<br>I2:33/7<br>C:21/9 | Adult smokers | TCM tablet                               | TCM tablets vs. NRT vs. NRT + psychological intervention (50 d)   | Abstinence rate, relapse rate                                                                        | 5, 10, 15 w |
| Liang WL 2013 | 60<br>I:30<br>C:30                  | Adult smokers | Acupuncture                              | Acupuncture vs. Nicotine patch (20 d)                             | Smoking cessation symptom scale, total effective rate                                                | NR          |
| Peng ZJ 2015  | 60<br>I:27/3<br>C:26/4              | Adult smokers | Acupuncture and auricular acupoints      | Acupuncture + auricular acupuncture vs. NRT (8 w)                 | FTND, HSI, abstinence rate, health economic indicators                                               | NR          |
| Wang YX 2006  | 204                                 | Adult smokers | Auricular acupressure                    | Auricular acupressure vs. Oral smoking cessation candy (20 d)     | Effectiveness rate                                                                                   | NR          |
| Wang YY 2017  | 300<br>I1:100<br>I2:100<br>C:100    | Adult smokers | Acupuncture, auricular acupressure       | Acupuncture + auricular acupressure vs. NRT (8 w)                 | 24-week continuous abstinence; 24-hour point prevalence abstinence                                   | 12 w        |
| Wu Y 2012     | 90<br>I:27/3<br>C:30/2              | Adult smokers | Auricular acupressure + body acupuncture | Auricular acupressure + body acupuncture vs. Nicotine patch (8 w) | Abstinence rate, FTND, HSI, MNWS, smoking craving questionnaire scale (QSU-Brief), smoking reduction | 20 w        |

|                                    |                                 |                                 |                                                          |                                                                                     |                                                                                                                                                                 |     |
|------------------------------------|---------------------------------|---------------------------------|----------------------------------------------------------|-------------------------------------------------------------------------------------|-----------------------------------------------------------------------------------------------------------------------------------------------------------------|-----|
| Zhang Y 2017                       | 60<br>I:30<br>C:30              | Patient willing to quit smoking | Acupuncture                                              | Acupuncture + intradermal needling vs Nicotine gum (30d)                            | Clinical effectiveness                                                                                                                                          | NR  |
| Zhang N 2022                       | 82<br>I:36/5<br>C:37/4          | Adult smokers                   | Acupuncture + Auricular acupressure                      | Acupuncture + Auricular acupressure vs Nicotine patch (8w)                          | Expiratory CO, daily cigarette consumption, Abstinence rate, HAMA, adverse event                                                                                | NR  |
| Zheng X 2019                       | 60<br>I:29/1<br>C:28/2          | Adult smokers                   | TCM quit smoking patch + 5A                              | TCM quit smoking patch acupressure +5a vs. Nicotine patch +5a (6 w)                 | Abstinence rate, relapse rate, FTND, MNWS, expiratory CO, daily cigarette consumption                                                                           | 2 w |
| <i>TCM + NRT vs. NRT, 2 trials</i> |                                 |                                 |                                                          |                                                                                     |                                                                                                                                                                 |     |
| Jang SB 2019                       | 41<br>I:20/0<br>C:20/1          | Adult smoker                    | TCM therapy: body (auricular) acupuncture + aromatherapy | TCM + NRT + consulting vs. NRT + consulting (4 w)                                   | 4-week continuous abstinence, 7-day prevalence abstinence; number of cigarettes per day; tobacco craving; FTND; MNWS; expiratory CO content; breathing capacity | 6 m |
| White AR 2007                      | 23<br>I1:4/2<br>I2:1/5<br>C:0/7 | Adult smokers                   | Auricular acupressure                                    | Binaural acupuncture beads + NRT vs. Monaural acupuncture beads + NRT vs. NRT (4 w) | NRT consumption; nicotine relapse symptoms; MPSS; 4-week abstinence rate; adverse event                                                                         | 2 w |

---

*TCM + Varenicline vs. Varenicline, 1 trial*

|             |                        |               |                                                        |                                                                                                                         |              |     |
|-------------|------------------------|---------------|--------------------------------------------------------|-------------------------------------------------------------------------------------------------------------------------|--------------|-----|
| Sun WX 2016 | 60<br>I:26/4<br>C:25/5 | Adult smokers | Quit smoking patch applied to "quit smoking acupoints" | Smoking cessation patch + oral varenicline + doctor's encouragement vs. Oral varenicline + doctor's encouragement (2 w) | Relapse rate | 3 m |
|-------------|------------------------|---------------|--------------------------------------------------------|-------------------------------------------------------------------------------------------------------------------------|--------------|-----|

---

*TCM vs. Placebo, 33 trials*

|                 |                                           |                |                                                                     |                                                                                                                               |                                                                                                                |                            |
|-----------------|-------------------------------------------|----------------|---------------------------------------------------------------------|-------------------------------------------------------------------------------------------------------------------------------|----------------------------------------------------------------------------------------------------------------|----------------------------|
| Baccetti S 2015 | 477<br>I1:57/102<br>I2:97/103<br>C:56/100 | Adult smokers  | Medicated acupuncture, plum-blossom needle or auricular acupuncture | Sham TCM + psychological support vs. Real TCM + psychological support vs. Real TCM (nr)                                       | Proportion of participants additional stopped smoking, and FTND                                                | End of treatment, 6 m, 1 y |
| Bier ID 2002    | 141<br>I1: 45<br>I2: 38<br>C:58           | Adult smokers  | Acupuncture                                                         | Acupuncture vs. Acupuncture + 5 weeks of cessation education vs. Sham acupuncture + 5 weeks of cessation education (4 or 5 w) | Change in cigarette consumption; abstinence rate                                                               | 3, 6, 12, 15 and 18 m      |
| Bilici M 2016   | 164<br>I:65/19<br>C:55/25                 | Adult smokers  | Electroacupuncture                                                  | Electroacupuncture vs. Sham electroacupuncture (4 w)                                                                          | FNDT change in 4, 8 weeks ; daily cigarette consumption change in 4, 8 weeks ; CO content change in 4, 8 weeks | 4 w                        |
| Cai YM 2000     | 268<br>I:128<br>C:140                     | Teenage smoker | Laser Needle                                                        | Laser needle vs. Placebo (4 w)                                                                                                | Abstinence rate, daily cigarette consumption                                                                   | 3 m                        |

---

|                  |                                                                             |               |                                |                                                                                                                                                            |                                                                                                                             |        |
|------------------|-----------------------------------------------------------------------------|---------------|--------------------------------|------------------------------------------------------------------------------------------------------------------------------------------------------------|-----------------------------------------------------------------------------------------------------------------------------|--------|
| Chae YB 2011     | 29<br>I:15/0<br>C:14/0                                                      | Adult smokers | Acupuncture                    | Acupuncture vs. Sham acupuncture (3 d)                                                                                                                     | Expiratory CO content, heart rate variability, response to smoking-related visual cues                                      | NR     |
| Dai RJ 2022      | 88<br>I1:21/1<br>I2:22/0<br>C1:21/1<br>C2:22/0                              | Adult smokers | Acupuncture                    | Acupuncture + Nicotine Patch vs Acupuncture + Sham Nicotine Patch vs Sham Acupuncture + Nicotine Patch vs Sham Acupuncture + Sham Nicotine Patch (8 weeks) | Abstinence rate, relapse rate, exhaled CO, FTND, MNWS, QSU-Brief                                                            | 16 w   |
| Fritz DJ 2013    | 125<br>I:16/48<br>C:14/47                                                   | Veteran       | Auricular electrostimulation   | Auricular needle electrostimulation vs. Sham auricular needle electrostimulation (5 w)                                                                     | Point prevalence abstinence in 3, 6 weeks , nicotine withdrawal symptoms, perceived stress, self-reported smoking frequency | 3, 6 w |
| Georgiou AJ 1998 | 265<br>I1:24<br>I2:30<br>I3:24<br>I4:30<br>C1:24<br>C2:30<br>C3:24<br>C4:30 | Adult smokers | Electrode acupoint stimulation | Electrical stimulation vs. Comfort electrical stimulation (7 d)                                                                                            | Daily cigarette consumption, abstinence rate, expiratory CO content                                                         | 12 w   |

|                |                         |                                                              |                                                                                                                                                                |                                                                                                  |                                                                                                            |                                  |
|----------------|-------------------------|--------------------------------------------------------------|----------------------------------------------------------------------------------------------------------------------------------------------------------------|--------------------------------------------------------------------------------------------------|------------------------------------------------------------------------------------------------------------|----------------------------------|
| Gillams J 1984 | 55<br>I:28<br>C:27      | Adult smoker<br>who<br>smoked >50<br>cigs/week for 5<br>year | Auricular acupoints<br>intradermal needling                                                                                                                    | Auricular acupoints intradermal needling vs non-specific acupoints stimulation (4w)              | NA                                                                                                         | NA                               |
| Gilbey V 1997  | 92<br>I:44<br>C:48      | Smoker who<br>smoked >15<br>cigs/day for 3<br>years          | Auricular acupoints<br>intradermal needling                                                                                                                    | Auricular acupoints intradermal needling vs inactive auricular point ('Kidney') stimulation (1w) | NA                                                                                                         | NA                               |
| He D 1997      | 46<br>I:8/18<br>C:10/10 | Adult smokers                                                | Body<br>electroacupuncture,<br>auricular acupuncture,<br>auricular acupressure                                                                                 | Acupuncture vs. Sham acupuncture<br>(3 w)                                                        | Daily cigarette consumption,<br>smoking-related blood<br>indicators, tobacco taste, and<br>tobacco craving | NR                               |
| He D 2001      | 46<br>I:8/18<br>C:10/10 | Adult smokers                                                | Body<br>electroacupuncture,<br>auricular acupuncture,<br>auricular acupressure,<br>body electroacupuncture,<br>auricular acupuncture,<br>auricular acupressure | Specialized smoking-cessation acupoint vs. Ineffective smoking cessation acupoint (3 w)          | Daily cigarette consumption;<br>physiological and biochemical<br>indices                                   | End of<br>treatment, 8<br>m, 5 y |

|                |                                                          |                    |                                                         |                                                                                                                                           |                                                                                                        |          |
|----------------|----------------------------------------------------------|--------------------|---------------------------------------------------------|-------------------------------------------------------------------------------------------------------------------------------------------|--------------------------------------------------------------------------------------------------------|----------|
| Huang Y 2012   | 60<br>I:27/3<br>C:25/5                                   | Adult smokers      | Smoke three needles combined with auricular acupressure | Smoke three needles combined with auricular acupressure vs. Smoke three needles combined with auricular acupressure + placebo acupuncture | Abstinence rate, cigarette smoking, FTND, and tobacco dependence self-rating scale                     | 3 m      |
| Hyun MK 2010   | 80<br>I:36/2<br>C:39/3                                   | Adult smokers      | Acupuncture                                             | Acupuncture vs. Sham acupuncture (2 w)                                                                                                    | NWS, BDI; BAI                                                                                          | 2 w      |
| Kang HC 2005   | 238<br>I:159/0<br>C:79/0                                 | High school smoker | Auricular acupuncture                                   | Auricular acupuncture vs. Sham acupuncture (4 w)                                                                                          | Abstinence rate; tobacco craving; daily cigarette consumption                                          | NR       |
| Kerr CM 2008   | 340                                                      | Smoker             | Laser stimulation of acupoints                          | Laser stimulation + sham treatments (inactive probe) vs Laser stimulation vs sham treatments (day 1, 3, 7, 14)                            | Relapse rate, physical symptoms                                                                        | 3, 6, 8m |
| Lambert C 2011 | 98<br>I1:20/0<br>I2:18/2<br>I3:13/7<br>I4:15/6<br>C:15/2 | Adult smokers      | Electroacupuncture                                      | Electroacupuncture of different intensities vs. Sham electroacupuncture (26 h)                                                            | Tobacco craving; blood pressure and other physiological and biochemical indices; expiratory CO content | NR       |

|             |                                        |                                                               |                        |                                                                                                                                                                                                           |                                                                                                                                                       |     |
|-------------|----------------------------------------|---------------------------------------------------------------|------------------------|-----------------------------------------------------------------------------------------------------------------------------------------------------------------------------------------------------------|-------------------------------------------------------------------------------------------------------------------------------------------------------|-----|
| Lee SN 2016 | 53<br>I:27/0<br>C:26/0                 | Male college smoker                                           | Ear pressure beads     | Auricular acupressure beads vs. Placebo group (6 w)                                                                                                                                                       | Expiratory CO content; FTND                                                                                                                           | 6 w |
| Lee EJ 2019 | 55<br>I1:17/1<br>I2:16/3<br>C:18/0     | Medical school smoker                                         | Auricular acupressure  | Auricular acupressure + positive group psychotherapy motivational interview vs. Placebo auricular acupressure + positive group psychotherapy motivational interview vs. Self-help smoking cessation (6 w) | 1-year abstinence rate, tobacco withdrawal symptoms                                                                                                   | 1 y |
| Lee EJ 2020 | 109<br>I1:41/1<br>I2:31/1<br>C:33/2    | Adult smokers                                                 | Auricular acupressure  | Auricular acupressure + positive group psychotherapy motivational interview vs. Placebo auricular acupressure + positive group psychotherapy motivational interview vs. Self-help smoking cessation (6 w) | Change in cigarette smoking; abstinence rate                                                                                                          | 1 y |
| Liu TY 2019 | 301<br>I1:89/16<br>I2:84/20<br>C:87/15 | Smokers with syndrome of intermingled phlegm and blood stasis | TCM quit smoking patch | TCM patch + sham nicotine patch vs. Sham TCM patch + nicotine patch vs. Sham TCM patch + sham nicotine patch (4 w)                                                                                        | Abstinence rate; relapse rate; TCM syndrome efficacy, daily cigarette consumption; expiratory CO content; serum cotinine; FTND; tobacco craving; MNWS | 4 w |

|                 |                                        |                                                          |                                                                                                      |                                                                                                                                                          |                                                                                       |      |
|-----------------|----------------------------------------|----------------------------------------------------------|------------------------------------------------------------------------------------------------------|----------------------------------------------------------------------------------------------------------------------------------------------------------|---------------------------------------------------------------------------------------|------|
| Ma W 2014       | 136<br>I:68<br>C:68                    | Smoker                                                   | Acupuncture                                                                                          | Acupuncture vs. Placebo (sham acupuncture) (8w)                                                                                                          | Abstinence rate, concentration of serum sialic acid and C-reactive protein            | 6m   |
| Parker LN 2007  | 41<br>I1/C1:9/9;<br>I2/C2:11/12        | Smoker                                                   | Auricular acupoints intradermal needling; auricular acupoints TEAS                                   | Auricular acupoints intradermal needling vs auricular acupoints TEAS vs non-specific acupoints stimulation vs non-specific auricular acupoints TEAS (3w) | NA                                                                                    | NA   |
| Qin YB 2020     | 180<br>I1:53/7<br>I2:57/3<br>C:56/4    | Tobacco dependence with phlegm and blood stasis syndrome | Chinese herbal quit smoking Babu Patch; Chinese herbal quit smoking Babu Patch combining acupuncture | Chinese herbal quit smoking Babu Patch vs quit smoking Babu Patch combining acupuncture vs placebo Babu Patch combining acupuncture (4 w)                | Clinical effectiveness, TCM syndrome score, FTND, MNWS, withdrawal rate, relapse rate | 6 m  |
| Sood A 2010     | 118<br>I1:22/18<br>I2:18/21<br>C:13/26 | Adult smokers                                            | TCM extraction                                                                                       | TCM extraction (900mg/d) vs. TCM extraction (1800mg/d) vs. Placebo (12 w)                                                                                | 7-day point prevalence abstinence, 6-month continuous abstinence                      | 12 w |
| Steiner RP 1982 | 32                                     | Adult smokers                                            | Acupuncture                                                                                          | Acupuncture vs. Sham acupuncture (NR)                                                                                                                    | Daily cigarette consumption                                                           | NR   |



---

|               |                          |               |                                                     |                                                                                                                          |                                                                |      |
|---------------|--------------------------|---------------|-----------------------------------------------------|--------------------------------------------------------------------------------------------------------------------------|----------------------------------------------------------------|------|
| Sun X 2009    | 48<br>I:24/0<br>C:24/0   | Adult smokers | Kangyinjian liquid patent                           | Kangyinjian liquid vs. Placebo (3 w)                                                                                     | Abstinence rate, smoking reduction, FTND                       | 12 w |
| Waite NR 1998 | 78<br>I:22/18<br>C:21/17 | Adult smokers | Auricular electroacupuncture+ Auricular acupressure | Auricular electroacupuncture + auricular acupressure vs. Sham auricular electroacupuncture + auricular acupressure (2 w) | Urinary cotinine; abstinence rate                              | 6 m  |
| White AR 1998 | 76<br>I:17/21<br>C:20/18 | Adult smokers | Electroacupuncture                                  | Electroacupuncture vs. Sham electroacupuncture (2 w)                                                                     | Cessation symptom score, abstinence rate                       | 2 w  |
| LI YK 2010    | 70<br>I:26/12<br>C:23/9  | Adult smoker  | Auricular Acupressure                               | Auricular acupressure vs sham acupressure (non-specific non-meridian points) (3w)                                        | FTND, MPSS, daily cigarette consumption, expiratory CO content | NR   |
| Wu TP 2007    | 118<br>I:48/11<br>C:52/7 | Adult smokers | Auricular acupuncture                               | Auricular acupuncture vs. Sham auricular acupuncture (8 w)                                                               | Daily cigarette consumption; nicotine cessation symptom score  | 6 m  |

---

|                                       |                                        |                     |                                    |                                                                                                                    |                                                                                                                                                                                                        |      |
|---------------------------------------|----------------------------------------|---------------------|------------------------------------|--------------------------------------------------------------------------------------------------------------------|--------------------------------------------------------------------------------------------------------------------------------------------------------------------------------------------------------|------|
| Zhang AL 2013                         | 43<br>I:8/12<br>C:10/13                | Adult smokers       | Auricular acupressure              | Specialized smoking-cessation auricular acupressure vs. Non-specific smoking-cessation auricular acupressure (8 w) | 7-day point prevalence abstinence, NWS assessment using the Mood and Physical Symptom Scale (MPSS), NRT consumption dosage during the trial, daily cigarette consumption, body weight, quality of life | 12 w |
| Zhao HJ 2018                          | 210<br>I:111/13<br>C:69/7              | Adult smokers       | TCM patch                          | TCM application group vs. Placebo application group (4 w)                                                          | Cigarette consumption, discomfort, change in appetite, sleep quality                                                                                                                                   | NR   |
| <i>TCM vs. no treatment, 6 trials</i> |                                        |                     |                                    |                                                                                                                    |                                                                                                                                                                                                        |      |
| Bai L 2001                            | 80<br>I1:20<br>C1:20<br>I2:20<br>C2:20 | Male college smoker | Acupuncture                        | Acupuncture Mr. Ren's smoking cessation area vs. Blank control (20 d)                                              | Blood cotinine level                                                                                                                                                                                   | NR   |
| Chen H 2019                           | 180<br>I1:50<br>I2:50<br>I3:50<br>C:30 | Adult smokers       | Lung clearing and quit smoking tea | Clear lung quit smoking tea vs. No intervention (1 y)                                                              | Ventilation function, abstinence rate                                                                                                                                                                  | NR   |

|                                                   |                           |                       |                                                     |                                                                                                                         |                                                                                        |      |
|---------------------------------------------------|---------------------------|-----------------------|-----------------------------------------------------|-------------------------------------------------------------------------------------------------------------------------|----------------------------------------------------------------------------------------|------|
| Li Y 2009                                         | 140<br>I:52/18<br>C:55/15 | Adult smokers         | Auricular acupressure                               | Auricular acupressure vs. Blank control (1 m)                                                                           | Abstinence rate, urinary sulfatide                                                     | 3 m  |
| Reif MH 1999                                      | 20<br>I:3/7<br>C:5/5      | Medical school smoker | Massage                                             | Hand/ear massage vs. Blank control (1 m)                                                                                | Anxiety, emotional state, tobacco craving, daily cigarette consumption                 | NR   |
| Silva RP 2014                                     | 30<br>I:21<br>C: 9        | Adult smoker          | Auriculotherapy                                     | Auriculotherapy vs blank control (auriculotherapy in points considered irrelevant to tobacco control) (10w)             | NCS, DND, expiratory CO content                                                        | 1m   |
| Yeh ML2014                                        | 112                       | Adult smokers         | Auricular acupressure                               | Auricular acupressure vs. Interactive media vs. Blank control (10 w)                                                    | Expiratory CO content; cotinine level; nicotine dependence                             | NR   |
| <i>TCM vs. Other non-drug therapies, 4 trials</i> |                           |                       |                                                     |                                                                                                                         |                                                                                        |      |
| Chu C 2013                                        | 46                        | Male college smoker   | Reinforcing and reducing manipulations of acupoints | Gua sha + magnetic bead auricular acupressure vs. Magnetic bead auricular acupressure vs. Psychological counseling (nr) | Expiratory CO content, FTND, cessation symptom scale, SCL90 scale and depression scale | 14 d |
| Guo B 2020                                        | 120<br>I:39/21<br>C:39/21 | Adult smokers         | Auricular acupressure + 5A                          | Auricular acupressure + 5a group vs. Consultation (4 w)                                                                 | Abstinence rate, daily cigarette consumption                                           | 6 m  |

|                                                                              |                          |                                                               |                                                       |                                                                                                                                                |                                                                                     |          |
|------------------------------------------------------------------------------|--------------------------|---------------------------------------------------------------|-------------------------------------------------------|------------------------------------------------------------------------------------------------------------------------------------------------|-------------------------------------------------------------------------------------|----------|
| He HJ 2019                                                                   | 60<br>I:19/11<br>C:17/13 | Psychiatric smoking patient                                   | Fire needle therapy                                   | Fire needle therapy vs. Education (3 w)                                                                                                        | Change in cigarette consumption, CO degree, abstinence rate, and cessation symptoms | 3 w, 8 w |
| Zhao L 2017                                                                  | 50<br>I:23/4<br>C:21/2   | Smoking patients in psychiatric department                    | Auricular acupressure                                 | Auricular acupressure vs. Cognitive behavioral therapy (cbt) (8 w)                                                                             | Abstinence rate, FTND, MNWS, expiratory CO content                                  | 24 w     |
| <i>TCM + Other non-drug therapies vs. Other non-drug therapies, 2 trials</i> |                          |                                                               |                                                       |                                                                                                                                                |                                                                                     |          |
| Gong ZY 2008                                                                 | 90                       | Smoking patients in psychiatric department                    | Auricular acupressure, TCM alternative cigarette      | Primary care vs. Primary care + auricular acupressure vs. Primary care + auricular acupressure + alternative cigarette (herbal) (not reported) | Total effective rate, abstinence response                                           | NR       |
| Leung JP 1977                                                                | 64<br>I:32<br>C:32       | Smoker who had smoked $\geq 1$ year and was motivated to stop | Auricular acupoints intradermal needling + counseling | Auricular acupoints intradermal needling + counseling vs. counseling (2w)                                                                      | NA                                                                                  | NA       |
| <i>Other comparisons, 3 trials</i>                                           |                          |                                                               |                                                       |                                                                                                                                                |                                                                                     |          |
| Chen JH 2016                                                                 | 80<br>I:40/0<br>C:40/0   | Patients with "smoking lung"                                  | Qingfei Huatan Liyan Decoction                        | Qingfei Huatan Liyan Decoction+ Ceftriaxone sodium vs Ceftriaxone sodium (2 w)                                                                 | Clinical effectiveness, abstinence rate                                             | 6 m      |

|                             |                                                            |               |                                                        |                                                                                                                                                                    |                                                                                                            |      |
|-----------------------------|------------------------------------------------------------|---------------|--------------------------------------------------------|--------------------------------------------------------------------------------------------------------------------------------------------------------------------|------------------------------------------------------------------------------------------------------------|------|
| Li Z 2018                   | 286<br>I:124/38<br>C:102/22                                | Adult smokers | TCM treatment based on syndrome differentiation        | Oral antidepressant sertraline + TCM treatment based on syndrome differentiation dialectical treatment vs. Non-nicotine replacement drug varenicline lithate (6 m) | Abstinence rate, FTND, and improvement in symptoms                                                         | 6 m  |
| Zeng XJ 2021                | 100<br>I:40/10<br>C:39/11                                  | Adult smokers | Catgut-embedding therapy                               | Catgut-embedding therapy + cognitive behavioral Therapy + Varenicline vs Varenicline (8 w)                                                                         | Abstinence rate, pulmonary function test, quality of life, patient compliance and satisfaction             | NR   |
| <i>Multigroup, 9 trials</i> |                                                            |               |                                                        |                                                                                                                                                                    |                                                                                                            |      |
| Chai X 2019                 | 500<br>I1:93/7<br>I2:92/8<br>I3:94/6<br>I4:95/5<br>C1:95/5 | Adult smokers | Acupuncture, auricular acupuncture, electroacupuncture | Acupuncture vs. Auricular acupuncture vs. Acupuncture + auricular acupuncture vs. Electroacupuncture vs. NRT (8 w)                                                 | Point prevalence abstinence; continuous abstinence rate, safety indicators; tobacco dependence (FTND, HSI) | 16 w |
| Chapelon FC 1997            | 998(548/450)<br>I1:272<br>I2:268<br>C1:243<br>C2:213       | Adult smokers | Acupuncture                                            | 2x2 design with acupuncture and nicotine gum (4 w)                                                                                                                 | Abstinence rate                                                                                            | 4 y  |

---

|                         |                                                        |                                     |                                |                                                                                                                                                         |                                                                            |      |
|-------------------------|--------------------------------------------------------|-------------------------------------|--------------------------------|---------------------------------------------------------------------------------------------------------------------------------------------------------|----------------------------------------------------------------------------|------|
| Chandrabhaga SV<br>2021 | 150<br>I1:50<br>I2:50<br>C:50                          | Adult smokers                       | Laser auricular<br>acupressure | Laser auricular acupressure + Psychological counseling vs Laser auricular acupressure vs Psychological counseling (4 w)                                 | FTND, VAS                                                                  | 1 m  |
| Cottraux JA<br>1983     | 558<br>I:108/32<br>C1:105/33<br>C2:105/35<br>C3:118/22 | Adult smokers                       | Acupuncture                    | Acupuncture vs. Behavioral therapy vs. Placebo drug vs. Blank control (2 w)                                                                             | Abstinence rate, daily cigarette consumption                               | 13 m |
| Kuang HJ 2021           | 90<br>I1:28/2<br>I2:28/2<br>C:29/1                     | Adult smokers                       | Auricular acupressure          | Auricular acupressure + Transcranial direct current Stimulation (tDCS) vs Auricular acupressure vs Transcranial direct current stimulation (tDCS) (4 w) | Daily cigarette consumption ,FTND, MNWS, QSU, Urine cotinine concentration | 4 w  |
| Yavagal PC<br>2021      | 56                                                     | Young adult<br>smoker aged<br>18–35 | Laser auricular<br>acupuncture | Laser auricular acupuncture vs psychological counselling vs laser auricular acupuncture + psychological counselling (2 w, 4 w)                          | FTND, urinary cotinine levels, cigarettes/bidis smoked per day             | NR   |

---

|                                     |                                                 |                                  |                                    |                                                                                                                                                             |                                                                                         |                  |
|-------------------------------------|-------------------------------------------------|----------------------------------|------------------------------------|-------------------------------------------------------------------------------------------------------------------------------------------------------------|-----------------------------------------------------------------------------------------|------------------|
| Zeng XJ 2019                        | 120<br>I1:30/10<br>I2:32/8<br>C:31/9            | Patients with tobacco dependence | Acupoint catgut embedding therapy  | Acupoint catgut embedding therapy + varenicline vs acupoint catgut embedding therapy vs varenicline (12w)                                                   | Clinical effectiveness, FTND, HSI, expiratory CO, quality of life                       | NR               |
| Jiang B 2011                        | 68<br>I1:21<br>I2:23<br>C:24                    | Military personnel               | Auricular acupressure              | Psychological intervention vs. psychological intervention + varenicline vs. Psychological intervention + auricular acupressure (nr)                         | Change numbers of cigarette smoking; continuous abstinence; point prevalence abstinence | 1, 3, 6 and 12 m |
| Li LB 2011                          | 300<br>I1:55/2<br>I2:62/1<br>C1:61/1<br>C2:54/1 | Adult smokers                    | Auricular acupoint stimulation     | Psychological intervention vs. Auricular acupoint stimulation vs. Psychological intervention + auricular acupoint stimulation vs. Blank control group (2 m) | Abstinence rate, daily cigarette consumption                                            | 6 m              |
| <hr/> <i>TCM vs. TCM, 15 trials</i> |                                                 |                                  |                                    |                                                                                                                                                             |                                                                                         |                  |
| Cai ZB 2022                         | 90<br>I1:29/1<br>I2:29/1<br>I3:30/0             | Adult smokers                    | Auricular acupressure, acupuncture | Auricular acupressure + Acupuncture vs Auricular acupressure vs Acupuncture (8 w)                                                                           | Exhaled CO, abstinence rate, FTND, AUTOS, daily cigarette consumption, adverse event    | NR               |

---

|             |                                             |                     |                                                                 |                                                                                                                    |                                                                                                      |      |
|-------------|---------------------------------------------|---------------------|-----------------------------------------------------------------|--------------------------------------------------------------------------------------------------------------------|------------------------------------------------------------------------------------------------------|------|
| Gu ZR 2007  | 400<br>I1:100<br>I2:100<br>I3:100<br>I4:100 | Adult smokers       | TCM acupoint application, odor therapy, laser needling          | TCM acupoint patch + odor therapy + laser needling vs. TCM acupoint patch vs. Odor therapy vs. Laser needling (nr) | Overall effective rate (smoking urge)                                                                | NR   |
| Han Y 2006  | 42<br>I1:20<br>I2:22                        | Adult smokers       | Auricular acupressure; Auricular acupressure + body acupuncture | Auricular acupressure vs. Auricular acupressure + body acupuncture (10 d)                                          | Abstinence rate, over all effective rate                                                             | 1 m  |
| Liu D 2015  | 48<br>I1:20/4<br>I2:18/6                    | Adult smokers       | Auricular acupressure; auricular acupressure + body acupuncture | Auricular acupressure vs. Auricular acupressure + body acupuncture (1 m)                                           | Cessation rates, FTND, daily cigarette consumption, and Tobacco Dependence Self-Rating Scale         | NR   |
| Ji J 2022   | 220<br>I1:105/5<br>I2:106/4                 | Adult smokers       | Acupuncture                                                     | High Frequency Acupuncture vs Low Frequency Acupuncture (8 w)                                                      | Abstinence rate, expiratory CO, urinary cotinine levels, FTND, HIS, MNWS, QSU-Brief, adverse event   | 12 w |
| Sun CX 2000 | 60<br>I:9/23<br>C:7/21                      | Male college smoker | Auricular acupressure                                           | Auricular acupressure + psychological care vs. Auricular acupressure (7 d)                                         | Overall effective rate (degree of reduction in daily smoking), improvement in anxiety and depression | 1 m  |



|              |                            |                                |                                                                            |                                                                                                                                              |                                                                                              |      |
|--------------|----------------------------|--------------------------------|----------------------------------------------------------------------------|----------------------------------------------------------------------------------------------------------------------------------------------|----------------------------------------------------------------------------------------------|------|
| Yeh ML 2009  | 79<br>I:39<br>C:40         | Adult smokers                  | Electroacupuncture, ear pressure bean                                      | Electroacupuncture + auricular acupuncture vs. Sham electroacupuncture + auricular acupuncture (6 w)                                         | Blood cotinine; expiratory CO content; tobacco consumption; abstinence rate                  | NR   |
| Wan ZX 2021  | 133<br>I:66/1<br>C:63/3    | Smoker who relapses            | Auricular acupuncture + Cognitive behavioral therapy (CBT)                 | Auricular acupuncture + Cognitive behavioral therapy (CBT) vs. auricular acupuncture (8 w)                                                   | Relapse rate, FTND, HIS, MNWS, QSU-Brief, expiratory CO                                      | 6 m  |
| Wang DF 2021 | 160<br>I:71/9<br>C:71/9    | Smoker willing to quit smoking | Auricular Point Sticking                                                   | Auricular point sticking (main acupoints + acupoints based on constitution identification) vs Auricular point sticking (main acupoints) (3m) | Clinical effectiveness                                                                       | NR   |
| Wang WH 2013 | 60<br>I1:15/15<br>I2:16/14 | Adult smokers                  | Acupuncture; acupuncture + moxibustion                                     | Acupuncture vs. Acupuncture + moxibustion (1 m)                                                                                              | Abstinence rate, overall effective rate                                                      | None |
| Wang XJ 2013 | 80<br>I1:39/1<br>I2:38/2   | Adult smokers                  | TCM compound intervention (TCM tea, auricular acupuncture, acupoint patch) | TCM complex intervention vs. TCM tea + multi-enzyme tablets (4 w)                                                                            | Abstinence rate, overall effective rate, decreased of levels of thiocyanate in morning urine | 6 m  |

|               |                            |                                                            |                                                                     |                                                                                                      |                                                   |     |
|---------------|----------------------------|------------------------------------------------------------|---------------------------------------------------------------------|------------------------------------------------------------------------------------------------------|---------------------------------------------------|-----|
| Zhou JH 2010  | 60<br>I1:13/17<br>I2:13/17 | Adult smokers                                              | Acupuncture group, electroacupuncture + auricular acupuncture group | Acupuncture group vs. Electroacupuncture + auricular group (20 d)                                    | Abstinence rate                                   | 6 m |
| Zhang JM 1989 | 120<br>I1:60/0<br>I2:60/0  | Adult smokers                                              | Body acupoints, auricular acupoints pressed medicine                | Acupressure with cowherb seed vs. Acupressure with white mustard seed, lycopodium, and soursop (6 d) | Total effective rate (daily smoking reduction)    | NR  |
| Zhang QG 2004 | 60<br>I1:30/0<br>I2::30/0  | Adult smokers                                              | Wrist and ankle acupuncture, acupuncture                            | Wrist and ankle acupuncture vs. Conventional acupuncture (4 w)                                       | Over all effective rate (daily smoking reduction) | 1 y |
| Zhang X 2016  | 60<br>I1:28/2<br>I2:29/1   | Smoker with syndrome of liver depression and qi stagnation | Acupuncture                                                         | Acupuncture at sub-matrix points of liver meridian vs. Conventional acupuncture (2 w)                | Overall effectiveness                             | 3 m |

**Notes:** M=male; F=female; y=year; m=month; w=week; d=day; NR=Not reported; NA=Not available; TCM=Traditional Chinese medicine; 5A= “Ask, advise, assess, assist, arrange” intervention; CO=Carbon Monoxide; FTND=Fagerstrom Test of Nicotine Dependence; HSI=Heaviness of smoking index; MNWS=Minnesota Nicotine Withdrawal Symptoms Scale; QSU-Brief= Brief Questionnaire of Smoking Urges; MPSS= Mood and Physical Symptom Scale; BDI=Beck depression inventory; BAI=Beck anxiety inventory; TEAS=Transcutaneous Electrical Acupoint Stimulation; DND=Degree of Nicotine dependence; NCS=Number of cigarettes smoked

Supplementary Table 6 Risk of bias and implementation details of blinding of RCTs of traditional Chinese medicine for smoking cessation

| Study ID             | Blinding of participant and trial personnel | Blinding of outcome assessor | Object of blinding               | Implementation details of blinding                       | Comparison                                                                                                                         |
|----------------------|---------------------------------------------|------------------------------|----------------------------------|----------------------------------------------------------|------------------------------------------------------------------------------------------------------------------------------------|
| <b>Bier ID 2002</b>  | High                                        | NC                           | Participant                      | Fake points: within 5mm from the real acupoint           | Acupuncture vs. acupuncture + 5 weeks of smoking cessation education vs. sham acupuncture + 5 weeks of smoking cessation education |
| <b>Bilici M 2016</b> | Low                                         | Low                          | Participant and outcome assessor | Reduced current level: 10Hz→<1Hz                         | Electroacupuncture vs. sham electroacupuncture                                                                                     |
| <b>Chae YB 2011</b>  | Low                                         | NC                           | Participant                      | In effective quit smoking acupoint, blunt needles        | Acupuncture vs. sham acupuncture                                                                                                   |
| <b>Cai YM 2000</b>   | Low                                         | Low                          | Participant and outcome assessor | Blindfolded treatment with no radiation in placebo group | Laser needle vs. placebo                                                                                                           |

|                       |      |    |             |                                                                                                                         |    |                                                                                                                                           |
|-----------------------|------|----|-------------|-------------------------------------------------------------------------------------------------------------------------|----|-------------------------------------------------------------------------------------------------------------------------------------------|
| <b>Cai ZB 2022</b>    | High | NC | Participant |                                                                                                                         | NR | Auricular acupressure +<br>Acupuncture vs Auricular<br>acupressure vs<br>Acupuncture                                                      |
| <b>Clavel FC 1997</b> | Low  | NC | Participant | Two cm away from the<br>investigational acupoints; Placebo<br>gum with the same appearance and<br>taste of nicotine gum |    | 2×2 design, acupuncture<br>and nicotine gum                                                                                               |
| <b>Chu C 2013</b>     | High | NC | Participant |                                                                                                                         | NR | Gua Sha + auricular<br>acupressure with magnetic<br>bead vs auricular<br>acupressure with magnetic<br>bead vs psychological<br>counseling |

|                                 |      |      |                  |             |                                                                                                                                                                    |
|---------------------------------|------|------|------------------|-------------|--------------------------------------------------------------------------------------------------------------------------------------------------------------------|
| <b>Chandrabhaga SV<br/>2021</b> | High | High | No blinding      | No blinding | Laser auricular<br>acupressure +<br>Psychological counseling<br>vs Laser auricular<br>acupressure vs<br>Psychological counseling                                   |
| <b>Chen SM 2022</b>             | High | Low  | Outcome assessor | NR          | Transcutaneous electrical<br>acupoint stimulation +<br>Auricular acupressure vs<br>Nicotine patch                                                                  |
| <b>Dai RJ 2022</b>              | NC   | NC   | Participant      | NR          | Acupuncture + Nicotine<br>Patch vs Acupuncture +<br>Sham Nicotine Patch vs<br>Sham Acupuncture +<br>Nicotine Patch vs Sham<br>Acupuncture + Sham<br>Nicotine Patch |

|                         |          |         |                                 |                                                                                                                   |    |                                                                                              |
|-------------------------|----------|---------|---------------------------------|-------------------------------------------------------------------------------------------------------------------|----|----------------------------------------------------------------------------------------------|
| <b>Deborah JF 2013</b>  | Low      | NC      | Participant and trial personnel | Same acupoints, reduced current level from 80Hz to 0Hz with unawareness of personnel in contact with the patients |    | Auricular needle electrical stimulation vs. sham auricular needle electrical stimulation     |
| <b>Georgiou AJ 1998</b> | Low      | NC      | Participant and trial personnel | The machine in the treatment group was connected; the machine in the control group was not                        |    | Electrical stimulation vs. sham electrical stimulation                                       |
| <b>Gilbey V 1977</b>    | low risk | unclear | Participants, personnel         |                                                                                                                   | NR | Auricular acupoints intradermal needling vs. inactive auricular point ('Kidney') stimulation |
| <b>Gillams J 1984</b>   | low risk | unclear | Participants, personnel         |                                                                                                                   | NR | Auricular acupoints intradermal needling vs. non-specific acupoints stimulation              |

|                     |     |    |             |                                                                                                                                                                                                                                                                                                              |                                                                                                                                              |
|---------------------|-----|----|-------------|--------------------------------------------------------------------------------------------------------------------------------------------------------------------------------------------------------------------------------------------------------------------------------------------------------------|----------------------------------------------------------------------------------------------------------------------------------------------|
| <b>He D 1997</b>    | Low | NC | Participant | Non-smoking-cessation/respiratory acupoints                                                                                                                                                                                                                                                                  | Specialized smoking-cessation acupoints vs. Non-smoking-cessation acupoints                                                                  |
| <b>He D 2001</b>    | Low | NC | Participant | Non-smoking-cessation/respiratory acupoints                                                                                                                                                                                                                                                                  | Specialized smoking-cessation acupoints vs. Non-smoking-cessation acupoints                                                                  |
| <b>Huang Y 2012</b> | NC  | NC | Participant | Auricular acupoint: replaced the cowherb seeds with the sponge of the same color and size; body acupoint: rubber ring placed on the acupoint, cut truncated into the length of the needle, so that the appearance is consistent, the tip of the needle touches the epidermis and does not penetrate the skin | Smoke-san acupuncture combined with auricular acupressure vs Smoke-san acupressure combined with auricular acupressure + placebo acupuncture |

|                     |      |     |                                  |                                                                                                    |                                                                                              |
|---------------------|------|-----|----------------------------------|----------------------------------------------------------------------------------------------------|----------------------------------------------------------------------------------------------|
| <b>Hyun MK 2010</b> | Low  | Low | Participant and outcome assessor | Ineffective smoking-cessation acupoint: 1 cm away from the investigational acupoints, inserted 3mm | Acupuncture vs. sham acupuncture                                                             |
| <b>Jang SB 2019</b> | High | Low | Outcome assessor                 | Outcome assessor was unaware of the grouping                                                       | TCM + NRT + consulting vs NRT + consulting                                                   |
| <b>Ji J 2022</b>    | High | Low | Outcome assessor                 | NR                                                                                                 | High Frequency Acupuncture vs Low Frequency Acupuncture                                      |
| <b>Kerr CM 2008</b> | High | NC  | Participants, personnel          | In Group C treatments were performed on days 1, 3, 7 and 14 using the sham probe.                  | Laser acupuncture vs. sham laser acupuncture vs. laser acupuncture or sham laser acupuncture |



|                       |      |      |                                 |                                                                                                                                                   |                                                                                                                                                                                                                 |
|-----------------------|------|------|---------------------------------|---------------------------------------------------------------------------------------------------------------------------------------------------|-----------------------------------------------------------------------------------------------------------------------------------------------------------------------------------------------------------------|
| <b>Kuang HJ 2021</b>  | High | Low  | Outcome assessor                | Outcome assessor was unaware of the grouping                                                                                                      | Auricular acupressure + Transcranial direct current Stimulation (tDCS) vs Auricular acupressure vs Transcranial direct current stimulation (tDCS)                                                               |
| <b>Lambert C 2011</b> | Low  | NC   | Participant and trial personnel | Transcutaneous electrical acupoint stimulation, real (10mA) vs. placebo substitute (5mA) vs. placebo (0mA), physician unaware of machine settings | Electroacupuncture of different intensities vs. sham electroacupuncture                                                                                                                                         |
| <b>Lee EJ 2019</b>    | Low  | High | Participant                     | Auricular acupressure patches without metal protrusions                                                                                           | Auricular point acupressure + group positive psychotherapy motivational interview vs. placebo auricular point acupressure + group positive psychotherapy motivational interview vs. self-help smoking cessation |

|                      |      |      |                                           |                                                         |                                                                                                                                                                                                                 |
|----------------------|------|------|-------------------------------------------|---------------------------------------------------------|-----------------------------------------------------------------------------------------------------------------------------------------------------------------------------------------------------------------|
| <b>Lee EJ 2020</b>   | High | High | Participant and outcome assessor (failed) | Auricular acupressure patches without metal protrusions | Auricular point acupressure + group positive psychotherapy motivational interview vs. placebo auricular point acupressure + group positive psychotherapy motivational interview vs. self-help smoking cessation |
| <b>Lee SN 2016</b>   | Low  | NC   | Participant                               | Non-smoking-cessation/respiratory acupoints             | Auricular acupressure with beans vs placebo                                                                                                                                                                     |
| <b>Leung JP 1991</b> | High | High | No blinding                               | No blinding                                             | auricular acupoints intradermal needling + counseling vs. counseling                                                                                                                                            |

|                       |           |           |                                 |                                                                                                                                         |                                                                                                                                                                  |
|-----------------------|-----------|-----------|---------------------------------|-----------------------------------------------------------------------------------------------------------------------------------------|------------------------------------------------------------------------------------------------------------------------------------------------------------------|
| <b>Liu TY 2019</b>    | Low       | NC        | Participant and trial personnel | Identical looking of quit smoking patches (placebo patches)                                                                             | TCM patch + fake nicotine patch vs fake TCM patch + nicotine patch vs fake TCM patch + fake nicotine patch                                                       |
| <b>Ma W 2014</b>      | high risk | high risk | Participant                     | Control Group received sham acupuncture in the eyes, eyebrows, shoulders and knees, none of which were associated with quitting smoking | Acupuncture vs. Placebo (sham acupuncture)                                                                                                                       |
| <b>Parker LN 1977</b> | low risk  | unclear   | Participants, personnel         | NR                                                                                                                                      | T1: auricular acupoints intradermal needling; T2: auricular acupoints TEAS vs. C1: non-specific acupoints stimulation; C2: non-specific auricular acupoints TEAS |

|                        |          |         |                                  |                                                                                                                            |                                                                                                                                     |
|------------------------|----------|---------|----------------------------------|----------------------------------------------------------------------------------------------------------------------------|-------------------------------------------------------------------------------------------------------------------------------------|
| <b>Qin YB 2020</b>     | low risk | unclear | Participant                      | Placebo Babu Patch contains no active ingredients and has the same shape, odor and appearance as the treatment group does. | Chinese herbal quit smoking Babu Patch vs quit smoking Babu Patch combining acupuncture vs placebo Babu Patch combining acupuncture |
| <b>Steiner RP 1982</b> | Low      | Low     | Participant and outcome assessor | Non-smoking-cessation/respiratory acupoints                                                                                | Specialized smoking-cessation acupoints vs. Non-smoking-cessation acupoints                                                         |
| <b>Silva RP 2014</b>   | high     | high    | Participants, personnel          | Auriculotherapy in points that have no effect on the focus of research.                                                    | Auriculotherapy vs auriculotherapy in points that have no effect on the focus of research                                           |
| <b>Sood A 2010</b>     | Low      | NC      | Participant and trial personnel  | Same appearance of drug in treatment group and in placebo group                                                            | Chinese herbal extraction (900mg/d) vs. Chinese herbal extraction (1800mg/d) vs. placebo                                            |

|                        |      |     |                                  |                                                                                                                |                                                                                                                       |
|------------------------|------|-----|----------------------------------|----------------------------------------------------------------------------------------------------------------|-----------------------------------------------------------------------------------------------------------------------|
| <b>Sun X 2009</b>      | Low  | NC  | Participant and trial personnel  | The placebo was prepared by the research team, and was similar with the appearance of the investigational drug | Kangyinjian liquid vs. placebo                                                                                        |
| <b>Yavagal PC 2021</b> | high | low | Outcome assessor                 | All interventions were done by an investigator who was not blinded to the treatment procedure                  | laser auricular acupuncture vs. psychological counselling vs. laser auricular acupuncture + psychological counselling |
| <b>Yeh ML 2009</b>     | NC   | NC  | Participant                      | Five cm away from the investigational acupoints                                                                | Electroacupuncture + auricular acupressure with beans vs. sham electroacupuncture + auricular acupressure with beans  |
| <b>Waite NR 1998</b>   | NC   | Low | Participant and outcome assessor | Needle and cowherb seed placed on the skin surface with zero pointer reading                                   | Auricular electroacupuncture + auricular acupressure vs. sham auricular electroacupuncture + auricular acupressure    |

|                     |           |         |                                     |                                                                                                                          |                                                                                                                                                        |
|---------------------|-----------|---------|-------------------------------------|--------------------------------------------------------------------------------------------------------------------------|--------------------------------------------------------------------------------------------------------------------------------------------------------|
| <b>Wan ZX 2021</b>  | high      | high    | No mentioned                        | NR                                                                                                                       | Auricular acupressure +<br>Cognitive behavioral<br>therapy (CBT) vs.<br>auricular acupressure                                                          |
| <b>Wang DF 2021</b> | high      | high    | No mentioned                        | NR                                                                                                                       | Auricular point sticking<br>(main acupoints +<br>acupoints based on<br>constitution identification)<br>vs Auricular point sticking<br>(main acupoints) |
| <b>White AR1998</b> | Low       | Low     | Participant and<br>outcome assessor | The needle placed in the mastoid<br>process of temporal bone without<br>acupoints and current reduced<br>from 100Hz to 0 | Electroacupuncture vs.<br>sham electroacupuncture                                                                                                      |
| <b>Wing YK 2010</b> | high risk | unclear | Participants,<br>personnel          | Non-specific non-meridian points<br>were chosen away from those<br>selected for the treatment group                      | Auricular acupressure vs.<br>sham auricular acupressure                                                                                                |

|                      |      |      |                                     |                                                |                                                                                                                                |
|----------------------|------|------|-------------------------------------|------------------------------------------------|--------------------------------------------------------------------------------------------------------------------------------|
| <b>Wu TP 2007</b>    | Low  | NC   | Participant                         | Non-smoking-cessation/respiratory<br>acupoints | Auricular acupuncture vs.<br>sham auricular<br>acupuncture                                                                     |
| <b>Zeng XJ 2019</b>  | High | High | No mentioned                        | NR                                             | Acupoint catgut<br>embedding therapy +<br>varenicline vs acupoint<br>catgut embedding therapy<br>vs varenicline                |
| <b>Zeng XJ 2021</b>  | High | NC   | No mentioned                        | NR                                             | Catgut-embedding therapy<br>+ cognitive behavioral<br>Therapy + Varenicline vs<br>Varenicline                                  |
| <b>Zhang AL 2013</b> | Low  | Low  | Participant and<br>outcome assessor | Non-smoking-cessation/respiratory<br>acupoints | Specialized<br>smoking-cessation<br>auricular acupressure vs.<br>non-specialized<br>smoking-cessation<br>auricular acupressure |

|                     |           |           |              |                                                          |                                                                                 |
|---------------------|-----------|-----------|--------------|----------------------------------------------------------|---------------------------------------------------------------------------------|
| <b>Zhang N 2022</b> | High      | NC        | No mentioned | NR                                                       | Acupuncture + Auricular acupressure vs Nicotine patch                           |
| <b>Zhang X 2016</b> | NC        | NC        | Participant  | Acupoints different from the treatment group             | Acupuncture at sub-matrix points of liver meridian vs. conventional acupuncture |
| <b>Zhang Y 2017</b> | high risk | high risk | No mentioned | NR                                                       | Acupuncture+ intradermal needling vs Nicotine gum                               |
| <b>Zhao HJ 2018</b> | Low       | NC        | Participant  | Identical looking quit smoking patches (placebo patches) | TCM application group vs. placebo application group                             |

**Notes:** NC=Not Clear; NR=Not Reported; TCM= Traditional Chinese Medicine; NRT= Nicotine Replacement Therapy



Supplementary Table 7 Summary of abstinence rate from meta-analysis of RTCs on smoking cessation in TCM

| Study ID           | Sample size | Main intervention                   | Effect size RR (95%) | Outcomes                               | P-value |
|--------------------|-------------|-------------------------------------|----------------------|----------------------------------------|---------|
| <b>TCM vs. NRT</b> |             |                                     |                      |                                        |         |
| Wang YY 2017       | T:100 C:100 | Acupuncture                         | 0.84 [0.50, 1.40]    | 7-day point prevalence abstinence      | 0.5010  |
| Wang YY 2017       | T:100 C:100 | Auricular acupuncture               | 1.00 [0.62, 1.62]    | 7-day point prevalence abstinence      | 1.0000  |
| Chen SM 2022       | T:100 C:100 | Auricular acupuncture               | 0.89 [0.56, 1.42]    | 2-month point prevalence abstinence    | 0.6306  |
| Wu Y 2012          | T:30 C:32   | Acupuncture                         | 1.14 [0.69, 1.87]    | 2-month point prevalence abstinence    | 0.6105  |
| Wu Y 2012          | T:30 C:32   | Acupuncture                         | 1.14 [0.69, 1.87]    | 5-month point prevalence abstinence    | 0.6105  |
| Peng ZJ 2015       | T:30 C:30   | Acupuncture + auricular acupressure | 0.33 [0.01, 7.87]    | Less than 7-day continuous abstinence  | 0.4557  |
| Peng ZJ 2015       | T:30 C:30   | Acupuncture + auricular acupressure | 0.33 [0.04, 3.03]    | 7-day to 1-month continuous abstinence | 0.2963  |
| Zhang N 2022       | T:41 C:41   | Acupuncture                         | 0.89 [0.38, 2.08]    | 7-day to 1-month continuous abstinence | 0.7852  |
| Wang YY 2017       | T:100 C:100 | Acupuncture                         | 0.78 [0.56, 1.10]    | 1 to 6 months continuous abstinence    | 0.1484  |

| <b>Study ID</b> | <b>Sample size</b> | <b>Main intervention</b>            | <b>Effect size RR (95%)</b> | <b>Outcomes</b>                      | <b>P-value</b> |
|-----------------|--------------------|-------------------------------------|-----------------------------|--------------------------------------|----------------|
| Wang YY 2017    | T:100 C:100        | Auricular acupuncture               | 0.70 [0.49, 0.99]           | 1 to 6 months continuous abstinence  | 0.0403         |
| Clavel F 1985   | T:224 C:205        | Acupuncture                         | 0.86 [0.59, 1.24]           | 1 to 6 months continuous abstinence  | 0.4089         |
| Peng ZJ 2015    | T:30 C:30          | Acupuncture + auricular acupressure | 0.75 [0.30, 1.90]           | 1 to 6 months continuous abstinence  | 0.5403         |
| Wu Y 2012       | T:30 C:32          | Acupuncture                         | 1.28 [0.44, 3.76]           | 1 to 6 months continuous abstinence  | 0.6527         |
| Li XP 2013      | T:33 C:35          | TCM tablet                          | 0.61 [0.36, 1.03]           | 1 to 6 months continuous abstinence  | 0.0447         |
| Zheng X 2019    | T:28 C:27          | TCM quit smoking patch              | 1.04 [0.59, 1.87]           | 1 to 6 months continuous abstinence  | 0.8825         |
| Zhang N 2022    | T:41 C:41          | Acupuncture                         | 1.33 [0.51, 3.50]           | 1 to 6 months continuous abstinence  | 0.5564         |
| Chen SM 2022    | T:100 C:100        | Auricular acupuncture               | 0.94 [0.65, 1.38]           | 1 to 6 months continuous abstinence  | 0.7668         |
| Wang YY 2017    | T:100 C:100        | Acupuncture                         | 0.30 [0.17, 0.51]           | 6 to 12 months continuous abstinence | 0.0000         |
| Wang YY 2017    | T:100 C:100        | Auricular acupuncture               | 0.68 [0.47, 0.99]           | 6 to 12 months continuous abstinence | 0.0382         |

| Study ID                   | Sample size | Main intervention                 | Effect size RR (95%) | Outcomes                                 | P-value |
|----------------------------|-------------|-----------------------------------|----------------------|------------------------------------------|---------|
| Clavel F 1985              | T:224 C:205 | Acupuncture                       | 0.65 [0.36, 1.17]    | More than 12-month continuous abstinence | 0.1497  |
| <b>TCM vs. Varenicline</b> |             |                                   |                      |                                          |         |
| Jiang B 2011               | T:23 C:21   | Auricular acupressure             | 1.22 [0.31, 4.82]    | 1-month point prevalence abstinence      | 0.7775  |
| Jiang B 2011               | T:23 C:21   | Auricular acupressure             | 1.03 [0.49, 2.17]    | 6-month point prevalence abstinence      | 0.9438  |
| Jiang B 2011               | T:23 C:21   | Auricular acupressure             | 1.83 [0.52, 6.39]    | 1 to 6 months continuous abstinence      | 0.3223  |
| Jiang B 2011               | T:23 C:21   | Auricular acupressure             | 1.28 [0.48, 3.42]    | 6 to 12 months continuous abstinence     | 0.6199  |
| <b>TCM vs. Bupropion</b>   |             |                                   |                      |                                          |         |
| Li HY 2019                 | T:49 C:48   | Acupoint catgut embedding therapy | 0.98 [0.61, 1.58]    | 1-month point prevalence abstinence      | 0.9322  |
| Li HY 2019                 | T:49 C:48   | Acupoint catgut embedding therapy | 0.98 [0.61, 1.58]    | 1 to 6 months continuous abstinence      | 0.9322  |

**TCM + conventional treatment vs. conventional treatment**

| Study ID                          | Sample size | Main intervention                                       | Effect size RR (95%) | Outcomes                               | P-value |
|-----------------------------------|-------------|---------------------------------------------------------|----------------------|----------------------------------------|---------|
| Li Z 2018                         | T:162 C:124 | TCM symptoms differentiation treatment                  | 0.75 [0.62, 0.90]    | 7-day to 1-month continuous abstinence | 0.0022  |
| Jang SB 2019                      | T:20 C:21   | Body acupuncture + auricular acupuncture + aromatherapy | 1.15 [0.67, 1.97]    | 1 to 6 months continuous abstinence    | 0.6220  |
| Li Z 2018                         | T:162 C:124 | TCM symptoms differentiation treatment                  | 1.35 [1.15, 1.58]    | 1 to 6 months continuous abstinence    | 0.0001  |
| Li Z 2018                         | T:162 C:124 | TCM symptoms differentiation treatment                  | 1.45 [1.23, 1.70]    | 6 to 12 months continuous abstinence   | 0.0000  |
| Jang SB 2019                      | T:20 C:21   | Body acupuncture + auricular acupuncture + aromatherapy | 1.23 [0.50, 3.02]    | 3-month point prevalence abstinence    | 0.6580  |
| Jang SB 2019                      | T:20 C:21   | Body acupuncture + auricular acupuncture + aromatherapy | 1.05 [0.56, 1.97]    | 6-month point prevalence abstinence    | 0.8788  |
| <b>TCM vs. Non-drug therapies</b> |             |                                                         |                      |                                        |         |
| Zhao L 2017                       | T:25 C:25   | Auricular acupressure                                   | 2.00 [0.98, 4.10]    | 1-month point prevalence abstinence    | 0.0365  |
| Zhao L 2017                       | T:25 C:25   | Auricular acupressure                                   | 3.00 [1.29, 7.00]    | 2-month point prevalence abstinence    | 0.0016  |

| <b>Study ID</b>        | <b>Sample size</b> | <b>Main intervention</b> | <b>Effect size RR (95%)</b> | <b>Outcomes</b>                          | <b>P-value</b> |
|------------------------|--------------------|--------------------------|-----------------------------|------------------------------------------|----------------|
| Lee EJ 2020            | T:42 C:32          | Auricular acupressure    | 0.57 [0.14, 2.37]           | 1 to 6 months continuous abstinence      | 0.4486         |
| Zhao L 2017            | T:25 C:25          | Auricular acupressure    | 5.00 [1.22, 20.55]          | 1 to 6 months continuous abstinence      | 0.0043         |
| Lee EJ 2019            | T:18 C:19          | Auricular acupressure    | 0.35 [0.02, 8.09]           | 6 to 12 months continuous abstinence     | 0.4483         |
| Lee EJ 2020            | T:42 C:32          | Auricular acupressure    | 0.76 [0.16, 3.53]           | 6 to 12 months continuous abstinence     | 0.7316         |
| Cottraux JA 1983       | T:140 C:138        | Acupuncture              | 2.27 [1.12, 4.58]           | 6 to 12 months continuous abstinence     | 0.0165         |
| Lee EJ 2019            | T:18 C:19          | Auricular acupressure    | 4.22 [0.52, 34.28]          | More than 12-month continuous abstinence | 0.1251         |
| <b>TCV vs. placebo</b> |                    |                          |                             |                                          |                |
| Wu TP 2007             | T:59 C:59          | Auricular acupuncture    | 1.50 [0.45, 5.04]           | 3-month point prevalence abstinence      | 0.5078         |
| Sood A 2010            | T:40 C:39          | TCM extraction 900mg     | 1.71 [0.54, 5.37]           | 3-month point prevalence abstinence      | 0.3485         |
| Sood A 2010            | T:39 C:39          | TCM extraction 1800mg    | 1.75 [0.56, 5.50]           | 3-month point prevalence abstinence      | 0.3261         |

| <b>Study ID</b> | <b>Sample size</b> | <b>Main intervention</b>                                            | <b>Effect size RR (95%)</b> | <b>Outcomes</b>                        | <b>P-value</b> |
|-----------------|--------------------|---------------------------------------------------------------------|-----------------------------|----------------------------------------|----------------|
| Sun X 2009      | T:24 C:24          | Kangyinjian liquid                                                  | 3.00 [0.13, 70.16]          | Less than 7-day continuous abstinence  | 0.4498         |
| White AR 1998   | T:38 C:38          | Electroacupuncture                                                  | 0.94 [0.55, 1.61]           | 7-day to 1-month continuous abstinence | 0.8154         |
| Bier ID 2002    | T:22 C:42          | Acupuncture                                                         | 0.78 [0.44, 1.39]           | 7-day to 1-month continuous abstinence | 0.3779         |
| Liu TY 2019     | T:105 C:102        | TCM quit smoking patch                                              | 1.98 [1.32, 2.97]           | 7-day to 1-month continuous abstinence | 0.0003         |
| Li Y 2009       | T:69 C:67          | Auricular acupressure                                               | 2.43 [1.15, 5.13]           | 7-day to 1-month continuous abstinence | 0.0115         |
| Waite NR 1998   | T:40 C:38          | Auricular electroacupuncture + auricular acupressure                | 2.04 [0.93, 4.44]           | 7-day to 1-month continuous abstinence | 0.0541         |
| Baccetti S 2015 | T:149 C:154        | Medicated acupuncture, plum-blossom needle or auricular acupuncture | 1.28 [0.93, 1.77]           | 7-day to 1-month continuous abstinence | 0.1314         |
| Qin YB 2020     | T:60 C:60          | TCM BaBu patch                                                      | 1.68 [1.24, 2.27]           | 7-day to 1-month continuous abstinence | 0.0001         |
| Sun X 2009      | T:24 C:24          | Kangyinjian liquid                                                  | 4.00 [0.95, 16.92]          | 7-day to 1-month continuous abstinence | 0.0250         |

| <b>Study ID</b> | <b>Sample size</b> | <b>Main intervention</b>                             | <b>Effect size RR (95%)</b> | <b>Outcomes</b>                      | <b>P-value</b> |
|-----------------|--------------------|------------------------------------------------------|-----------------------------|--------------------------------------|----------------|
| Cai YM 2000     | T:101 C:107        | Laser Needle                                         | 0.95 [0.59, 1.51]           | 1 to 6 months continuous abstinence  | 0.8147         |
| Bier ID 2002    | T:16 C:25          | Acupuncture                                          | 1.56 [0.61, 4.01]           | 1 to 6 months continuous abstinence  | 0.3621         |
| Li Y 2009       | T:69 C:67          | Auricular acupressure                                | 2.36 [1.05, 5.32]           | 1 to 6 months continuous abstinence  | 0.0265         |
| Lee EJ 2019     | T:18 C:19          | Auricular acupressure                                | 0.21 [0.01, 4.11]           | 1 to 6 months continuous abstinence  | 0.2024         |
| Lee EJ 2020     | T:42 C:32          | Auricular acupressure                                | 0.61 [0.27, 1.37]           | 1 to 6 months continuous abstinence  | 0.2312         |
| Dai RJ 2022     | T:22 C:22          | Acupuncture                                          | 2.80 [1.22, 6.44]           | 1 to 6 months continuous abstinence  | 0.0026         |
| Waite NR 1998   | T:40 C:38          | Auricular electroacupuncture + auricular acupressure | 18.07 [1.09, 300.14]        | 1 to 6 months continuous abstinence  | 0.0010         |
| Sun X 2009      | T:24 C:24          | Kangyinjian liquid                                   | 7.00 [0.93, 52.63]          | 1 to 6 months continuous abstinence  | 0.0136         |
| Bier ID 2002    | T:16 C:25          | Acupuncture                                          | 1.56 [0.61, 4.01]           | 6 to 12 months continuous abstinence | 0.3621         |
| Lee EJ 2019     | T:18 C:19          | Auricular acupressure                                | 0.35 [0.02, 8.09]           | 6 to 12 months continuous abstinence | 0.4483         |

| Study ID             | Sample size | Main intervention                                                   | Effect size RR (95%) | Outcomes                                  | P-value |
|----------------------|-------------|---------------------------------------------------------------------|----------------------|-------------------------------------------|---------|
| Lee EJ 2020          | T:42 C:32   | Auricular acupressure                                               | 0.63 [0.21, 1.90]    | 6 to 12 months continuous abstinence      | 0.4217  |
| Waite NR 1998        | T:40 C:38   | Auricular electroacupuncture + auricular acupressure                | 10.46 [0.60, 183.01] | 6 to 12 months continuous abstinence      | 0.0261  |
| Baccetti S 2015      | T:149 C:154 | Medicated acupuncture, plum-blossom needle or auricular acupuncture | 1.75 [1.17, 2.61]    | 6 to 12 months continuous abstinence      | 0.0047  |
| Bier ID 2002         | T:15 C:24   | Acupuncture                                                         | 0.53 [0.28, 1.03]    | More than 12-month continuous abstinence  | 0.0233  |
| Lee EJ 2019          | T:18 C:19   | Auricular acupressure                                               | 4.22 [0.52, 34.28]   | More than 12-month continuous abstinence  | 0.1251  |
| Lee EJ 2020          | T:42 C:32   | Auricular acupressure                                               | 0.76 [0.24, 2.41]    | More than 12-month continuous abstinence  | 0.6474  |
| <b>TCM vs. Blank</b> |             |                                                                     |                      |                                           |         |
| Chen H 2019          | T:75 C:75   | Lung clearing and quit smoking tea                                  | 1.20 [1.02, 1.42]    | More than 12 months continuous abstinence | 0.0241  |



| <b>Study ID</b>                                        | <b>Sample size</b> | <b>Main intervention</b>       | <b>Effect size RR (95%)</b> | <b>Outcomes</b>                      | <b>P-value</b> |
|--------------------------------------------------------|--------------------|--------------------------------|-----------------------------|--------------------------------------|----------------|
| Cottraux JA 1983                                       | T:140 C:138        | Acupuncture                    | 2.27 [1.12, 4.58]           | 6 to 12 months continuous abstinence | 0.0165         |
| <b>TCM + non-drug therapies vs. Non-drug therapies</b> |                    |                                |                             |                                      |                |
| Li LB 2011                                             | T:57 C:55          | Auricular acupoint stimulation | 1.93 [0.70, 5.29]           | 1 to 6 months continuous abstinence  | 0.1836         |

**Notes:** TCM=traditional Chinese medicine; T=Treatment group; C=control group; RR-risk ratio; CI=confidence interval.

Supplementary Table 8 Adverse events reported in RCTs of traditional Chinese medicine for smoking cessation

| Study ID      | Sample                      | Main Intervention                                                      | Comparison                                                                                     | Safety Event (n)                                                                                                                                           |
|---------------|-----------------------------|------------------------------------------------------------------------|------------------------------------------------------------------------------------------------|------------------------------------------------------------------------------------------------------------------------------------------------------------|
| Chen SM 2022  | 200<br>I:99/1<br>C:98/2     | Transcutaneous electrical acupoint stimulation + Auricular acupressure | Transcutaneous electrical acupoint stimulation + Auricular acupressure vs Nicotine patch (8 w) | I: headache 1,<br>C: kin allergy 5                                                                                                                         |
| Ji J 2022     | 220<br>I1:105/5<br>I2:106/4 | Acupuncture                                                            | High Frequency Acupuncture vs Low Frequency Acupuncture (8 w)                                  | Skin hematoma 3, skin bruising 3, dizziness due to tension 2, local tingling 1                                                                             |
| Fritz DJ 2013 | 125<br>I:16/48<br>C:14/47   | Auricular electrostimulation                                           | Auricular acupressure vs. sham auricular acupressure (5 w)                                     | 15 participants (9 in intervention group, 6 in placebo group), only 1 event considered relate to intervention (auricle discomfort, no redness or swelling) |
| Li HY 2019    | 100<br>I: 41/8<br>C: 40/8   | Acupoint catgut embedding therapy                                      | Acupoint catgut embedding therapy vs. Bupropion Hydrochloride Sustained-Release Tablets (7 w)  | I: local pain 1, local pain, numb, and swell 3, red and swollen skin 2, induration 1<br>C: nausea 7, upset stomach 4, dry mouth 2, insomnia 1              |

| Study ID    | Sample                                   | Main Intervention                      | Comparison                                                                                                                                               | Safety Event (n)                                                                                                                                                                                                                                                                                                                                                                                                                                                                                                                                                         |
|-------------|------------------------------------------|----------------------------------------|----------------------------------------------------------------------------------------------------------------------------------------------------------|--------------------------------------------------------------------------------------------------------------------------------------------------------------------------------------------------------------------------------------------------------------------------------------------------------------------------------------------------------------------------------------------------------------------------------------------------------------------------------------------------------------------------------------------------------------------------|
| Liu TY 2019 | 301<br>I1:89/16<br>I2:84/20<br>C:87/15   | TCM quit smoking patch                 | TCM quit smoking patch + sham nicotine patch vs. sham TCM quit smoking patch + nicotine patch vs sham TCM quit smoking patch + sham nicotine patch (4 w) | 26 participants. 11 patients (3 in the experimental group, 6 in the positive drug group, and 2 in placebo group) quit due to skin allergy (rash at the patch spots), all symptoms disappeared after 1-week follow-up; 8 participants (dizziness and headache) and 3 participants (palpitation) were related to the adverse effects of nicotine patches in positive drug group; 1 participant (palpitation) indefinitely related to TCM patch in experimental group; 3 participants (gastrointestinal discomfort, 1 in each of the 3 groups) unrelated to the TCM patches |
| Qin YB 2020 | 180<br>I1:53/7<br>I2:57/3<br>C:56/4      | Chinese herbal quit smoking Babu Patch | Chinese herbal quit smoking Babu Patch vs. quit smoking Babu Patch combining acupuncture vs placebo Babu Patch combining acupuncture (4 w)               | Among the three groups, 4 patients appeared the symptom of skin allergy for longer than half of the treatment course, which disappeared when the treatment stopped.                                                                                                                                                                                                                                                                                                                                                                                                      |
| Sood A 2010 | 118<br>I1: 22/18<br>I2: 18/21<br>C:13/26 | TCM extraction                         | TCM extraction (900 mg/d) vs. TCM extraction (1800 mg/d) vs. placebo (12 w)                                                                              | I1: insomnia 4, dizziness 1, easy to wake up at night 2, clear dreams 1<br>I2: insomnia 1, dizziness 1, headache 1, clear dreams 1<br>C: insomnia 1, dizziness 1, headache 1                                                                                                                                                                                                                                                                                                                                                                                             |

| Study ID      | Sample                              | Main Intervention                   | Comparison                                                                                                            | Safety Event (n)                                                                                                                                                                                                                     |
|---------------|-------------------------------------|-------------------------------------|-----------------------------------------------------------------------------------------------------------------------|--------------------------------------------------------------------------------------------------------------------------------------------------------------------------------------------------------------------------------------|
| Wang YY 2017  | 300<br>I1: 100<br>I2: 100<br>C: 100 | Acupuncture, auricular acupressure  | Acupuncture vs. auricular acupressure vs. NRT (8 w)                                                                   | I1: vertigo 1, hematoma 1<br>I2: None<br>C: local skin irritation 2                                                                                                                                                                  |
| White AR 2007 | 23<br>I1: 4/2<br>I2: 1/5<br>C:0/7   | Auricular acupressure               | Binaural acupuncture beads + NRT vs. monaural acupuncture beads + NRT vs. NRT (4 w)                                   | I1: Discomfort 1                                                                                                                                                                                                                     |
| Wu TP 2007    | 118<br>I: 48/11<br>C: 52/7          | Auricular acupuncture               | Auricular acupuncture vs. sham auricular acupuncture (8 w)                                                            | I: small amount of bleeding 2, dizziness 1, nausea 1, residual stabbing sensation 13, pressure pain 23, slight infection 1<br>C: small amount of bleeding 1, dizziness 3, nausea 1, residual stabbing sensation 11, pressure pain 27 |
| Zhang AL 2013 | 43<br>I: 8/12<br>C:10/13            | Auricular acupressure               | Specialized smoking-cessation auricular acupressure vs. non-specialized smoking-cessation auricular acupressure (8 w) | Mild to moderate ear discomfort<br>I: 1<br>C: 5                                                                                                                                                                                      |
| Zhang N 2022  | 82<br>I:36/5<br>C:37/4              | Acupuncture + Auricular acupressure | Acupuncture + Auricular acupressure vs Nicotine patch (8 w)                                                           | I: fatigue 1;<br>C: skin allergy 4, dizziness and chest tightness 3, fatigue 2                                                                                                                                                       |

**Notes:** TCM=Traditional Chinese Medicine; I=Intervention group; C=Control group; W=Week; NRT=Nicotine Replacement Therapy

© 2023 Lu CL. et al.
